1  
2  
3  
4  
5  
6  
7  
8  
9  
10  
11  
12  
13  
14  
15  
16  
17  
18  
19  
20  
21  
22  
23

**ARHGEF26 enhances *Salmonella* invasion and inflammation in cells and mice**

Jeffrey S. Bourgeois<sup>a,b</sup>, Liuyang Wang<sup>a</sup>, Monica I. Alvarez<sup>a</sup>, Jeffrey Everitt<sup>c</sup>, Sahezeel Awadia<sup>d</sup>, Erika S. Wittchen<sup>e</sup>, Rafael Garcia-Mata<sup>d</sup>, Dennis C. Ko<sup>a,b,f</sup>

**Affiliations**

<sup>a</sup> Department of Molecular Genetics and Microbiology, School of Medicine, Duke University, Durham, NC, USA

<sup>b</sup> University Program in Genetics and Genomics, Duke University, Durham, NC, USA

<sup>c</sup> Department of Pathology, Duke University Medical Center, Durham, NC, USA

<sup>d</sup> Department of Biological Sciences, University of Toledo, Toledo, OH, USA

<sup>e</sup> Department of Cell Biology and Physiology, University of North Carolina, Chapel Hill, NC, USA

<sup>f</sup> Division of Infectious Diseases, Department of Medicine, School of Medicine, Duke University, Durham, NC, USA

\*To whom correspondence should be addressed: Dennis C. Ko, 0049 CARL Building Box 3053, 213 Research Drive, Durham, NC 27710. 919-684-5834.

[dennis.ko@duke.edu](mailto:dennis.ko@duke.edu). @denniskoHiHOST

## 24 **Abstract**

25 *Salmonella* hijack host machinery in order to invade cells and establish infection.  
26 While considerable work has described the role of host proteins in invasion, much less is  
27 known regarding how natural variation in these invasion-associated host proteins affects  
28 *Salmonella* pathogenesis. Here we leveraged a candidate cellular GWAS screen to  
29 identify natural genetic variation in the *ARHGEF26* (*Rho Guanine Nucleotide Exchange*  
30 *Factor 26*) gene that renders lymphoblastoid cells susceptible to *Salmonella* Typhi and  
31 Typhimurium invasion. Experimental follow-up redefined ARHGEF26's role in *Salmonella*  
32 epithelial cell invasion, identified serovar specific interactions, implicated ARHGEF26 in  
33 SopE-mediated invasion, and revealed that the ARHGEF26-associated proteins DLG1  
34 and SCRIB facilitate *S. Typhi* uptake. Importantly, we show that ARHGEF26 plays a  
35 critical role in *S. Typhimurium* pathogenesis by contributing to bacterial burden in the  
36 enteric fever murine model, as well as inflammation in the gastroenteritis infection model.  
37 The impact of *ARHGEF26* on inflammation was also seen in cells, as knockdown reduced  
38 IL-8 production in HeLa cells. Together, these data reveal pleiotropic roles for ARHGEF26  
39 function during infection and highlight that many of the interactions that occur during  
40 infection that are thought to be well understood likely have underappreciated complexity.

41

## 42 **Author Summary**

43 During infection, *Salmonella* manipulates host cells into engulfing the bacteria and  
44 establishing an intracellular niche. While many studies have identified genes involved in  
45 different stages of this *Salmonella* invasion process, few studies have examined how  
46 differences between human hosts contribute to infection susceptibility. Here we leveraged

47 a candidate genetic screen to identify natural genetic variation in the human ARHGEF26  
48 gene that correlates with *Salmonella* invasion. Springboarding from this result, we  
49 experimentally tested and revised existing models of ARHGEF26's role in *Salmonella*  
50 invasion, discovered an additional new role for ARHGEF26 during *Salmonella* disease,  
51 and confirmed our findings in mouse models. Building on how ARHGEF26 functions in  
52 other contexts, we implicated two ARHGEF26-interacting host proteins as contributors to  
53 *Salmonella* pathobiology. Collectively, these results identify a potential source of inter-  
54 person diversity in susceptibility to *Salmonella* disease, expand our molecular  
55 understanding of *Salmonella* infection to include a multifaceted role for ARHGEF26, and  
56 identify several important future directions that will be important to understand how  
57 *Salmonella* recruit and manipulate ARHGEF26 as well as how ARHGEF26 is able to drive  
58 *Salmonella*-beneficial processes.

59

## 60 **Introduction**

61 The ability for bacteria to invade non-phagocytic host cells has long been  
62 recognized as a crucial trait of many pathogenic bacteria. Observations of this  
63 phenomena in *Salmonella* stretch back to at least 1920 when Margaret Reed Lewis  
64 observed that *Salmonella enterica* serovar Typhi (*S. Typhi*) induces vacuole formation  
65 during invasion of chick embryo tissues (1). With the advent of molecular biology, Galán  
66 and others identified that the type-III secretion system coded by genes in the *Salmonella*  
67 Pathogenicity Island-1 (SPI-1) facilitates *Salmonella* invasion (2, 3). Additional work  
68 demonstrated that the *Salmonella* effector proteins SopB, SopE, and SopE2 drive uptake  
69 of *Salmonella* in cultured cells by macropinocytosis through their ability to hijack or mimic

70 host proteins (4-9). The importance of *Salmonella* invasion has been affirmed through  
71 several *in vivo* studies, as strains defective for the invasion apparatus are severely  
72 attenuated in their ability to colonize and disseminate (3), and/or drive inflammation (10,  
73 11) in mouse models.

74 While much is known about the molecular mechanisms of host-*Salmonella*  
75 interactions, significantly less is known about why individuals have different  
76 susceptibilities to *Salmonella* infection. For example, in one recent *S. Typhi* human  
77 challenge study, the amount of *S. Typhi* found in patient blood varied substantially (0.05-  
78 22.7 CFU/mL blood in control patients), and 23% of participants resisted Typhoid fever  
79 onset (12). To help fill this gap, genome-wide association studies (GWAS) of Typhoid  
80 fever and non-typhoidal *Salmonella* bacteremia have demonstrated the importance of the  
81 HLA-region (13) and immune signaling (14) in *Salmonella* susceptibility. We hypothesized  
82 that differences in susceptibility to SPI-1 effectors and *Salmonella* host cell invasion also  
83 regulate risk of *Salmonella* infection. In fact, using a novel cellular genome-wide  
84 association platform called Hi-HOST (15-17), we previously determined that SNPs that  
85 affect *VAC14* expression regulate susceptibility to *S. Typhi* invasion through regulation of  
86 plasma membrane cholesterol (18). This demonstrates the power of cellular GWAS to  
87 identify natural genetic variation in cellular traits and enhance our mechanistic  
88 understanding of variable disease susceptibility.

89 In this work, we leveraged current understanding of host factors manipulated by  
90 *Salmonella* to identify human genetic variation that regulates invasion. We identified a  
91 locus in the guanine exchange factor (GEF) *ARHGEF26* (also known as *SGEF*) that  
92 correlated with susceptibility to *S. Typhi* and *S. Typhimurium* invasion. Previous work has

93 demonstrated that ARHGEF26 contributes to *Salmonella*-induced membrane ruffling and  
94 was hypothesized to impact invasion (7). Current models speculate that ARHGEF26  
95 contributes to membrane ruffling by enabling SopB-mediated activation of the human  
96 small GTPase RHO G. Here we demonstrated that ARHGEF26 regulates susceptibility to  
97 *Salmonella* invasion through *ARHGEF26* knockdown and overexpression. We also  
98 expanded our understanding of *Salmonella*'s interaction with ARHGEF26, finding that *S.*  
99 Typhi, but not *S. Typhimurium* uses ARHGEF26 for SopB- and SopE- mediated invasion  
100 of HeLa cells. Notably, we observed no effect of *RHO G* on invasion, in line with recent  
101 studies that found RHO G is dispensable for invasion (19, 20). In contrast, we show that  
102 reported interacting partners of ARHGEF26 in the Scribble complex, DLG1 (also known  
103 as SAP97) and SCRIB (also known as Scribble) also contribute to *S. Typhi* invasion. We  
104 demonstrated the importance of these findings *in vivo*, finding that *Arhgef26* deletion  
105 restricted *S. Typhimurium* burden in a mouse model of infection. Finally, we report a  
106 previously unappreciated role for ARHGEF26 in regulating the inflammatory response to  
107 *Salmonella* in both HeLa cells and mice. Collectively, these data identify a novel locus  
108 that contributes to natural genetic susceptibility to SPI-1-mediated invasion and elucidate  
109 our mechanistic understanding of ARHGEF26-mediated *Salmonella* invasion and  
110 inflammation.

111

## 112 **Results**

113

114 Cellular GWAS identifies an association between the rs993387 locus and *Salmonella*

115 invasion

116 Our previous cellular GWAS (hereafter called H2P2; (17)) linked natural human  
117 genetic variation across 528 genotyped lymphoblastoid cell lines (LCLs) from parent-  
118 offspring trios to 79 infection phenotypes, including rates of *Salmonella* invasion. To  
119 quantify *Salmonella* invasion in H2P2, we infected LCLs with GFP-tagged *Salmonella*  
120 *enterica* serovar Typhi (*S. Typhi*) or *Salmonella enterica* serovar Typhimurium (*S.*  
121 Typhimurium) and counted the GFP<sup>+</sup> host cells, which contain viable bacteria, by flow  
122 cytometry three hours post infection (Figure 1A). Using *Salmonella* invasion as a  
123 quantitative trait, we performed GWAS to identify loci associated with susceptibility to  
124 *Salmonella* invasion.

125 H2P2 identified 17 SNPs that passed genome-wide significance ( $p < 5 \times 10^{-8}$ ),  
126 however, no *Salmonella* invasion-associated SNPs passed this threshold (17). We next  
127 leveraged the last twenty years of *Salmonella* cellular microbiology and restricted our  
128 search space to common SNPs (minor allele frequency > 0.05) in 25 genes that regulate  
129 *Salmonella*-induced actin rearrangement, membrane ruffling, and/or invasion (Figure 1B,  
130 Table S1). These host genes encode proteins affected by SPI-1 secreted proteins  
131 (reviewed (21, 22)), and include *ARF1* (23), *ARF6* (23, 24), *ARHGEF26* (commonly called  
132 *SGEF*) (7), *RHOG* (7, 25), *CYTH2* (23, 24), *CDC42* (7, 26-28), *RAC1* (7, 26, 28, 29), and  
133 actin (*ACTB*) (30-33), as well as genes in the WAVE (23, 28, 34) and Arp2/3 (27, 28, 34)  
134 complexes. Together, the proteins in this cascade lead to actin cytoskeletal  
135 rearrangements that enable macropinocytosis and bacterial uptake.

136 Plotting this SNP subset on a QQ plot to compare expected and observed p-values  
137 revealed a deviation towards p-values lower than expected by chance for both *S. Typhi*  
138 (Figure 1C) and *S. Typhimurium* (Figure 1D) invasion. The lowest p-value SNP

139 associated with invasion of *S. Typhi* was rs993387 ( $p=0.0001$ ), which is located in an  
140 *ARHGEF26* intron. This SNP also showed deviation with *S. Typhimurium* invasion  
141 ( $p=0.0004$ ), although a linked SNP, rs71744878 (LD  $r^2 =0.63$  for ESN; 0.48 for GWD;  
142 0.97 for KHV; 0.75 for IBS from LD Link (35)) had a slightly lower  $p$ -value. Removing all  
143 *ARHGEF26* SNPs from the analysis returned the remaining SNPs to the expected neutral  
144 distribution, suggesting, surprisingly, we only detect natural genetic variation in  
145 *ARHGEF26* that substantially impacted *Salmonella* invasion (Figure S1A, S1B). The  
146 rs993387 G allele associated with susceptibility to invasion, and the SNP appears to have  
147 a larger effect on *S. Typhi* invasion (2.6%, Figure 1E) compared to *S. Typhimurium*  
148 invasion (0.7%, Figure 1F). Within each of the four populations used in H2P2, the rarity  
149 of the minor allele made it difficult to comment on the impact of the GG genotype, but the  
150 directionality of effect between the TT and GT genotypes was preserved across all  
151 populations (Figure S1C).

152

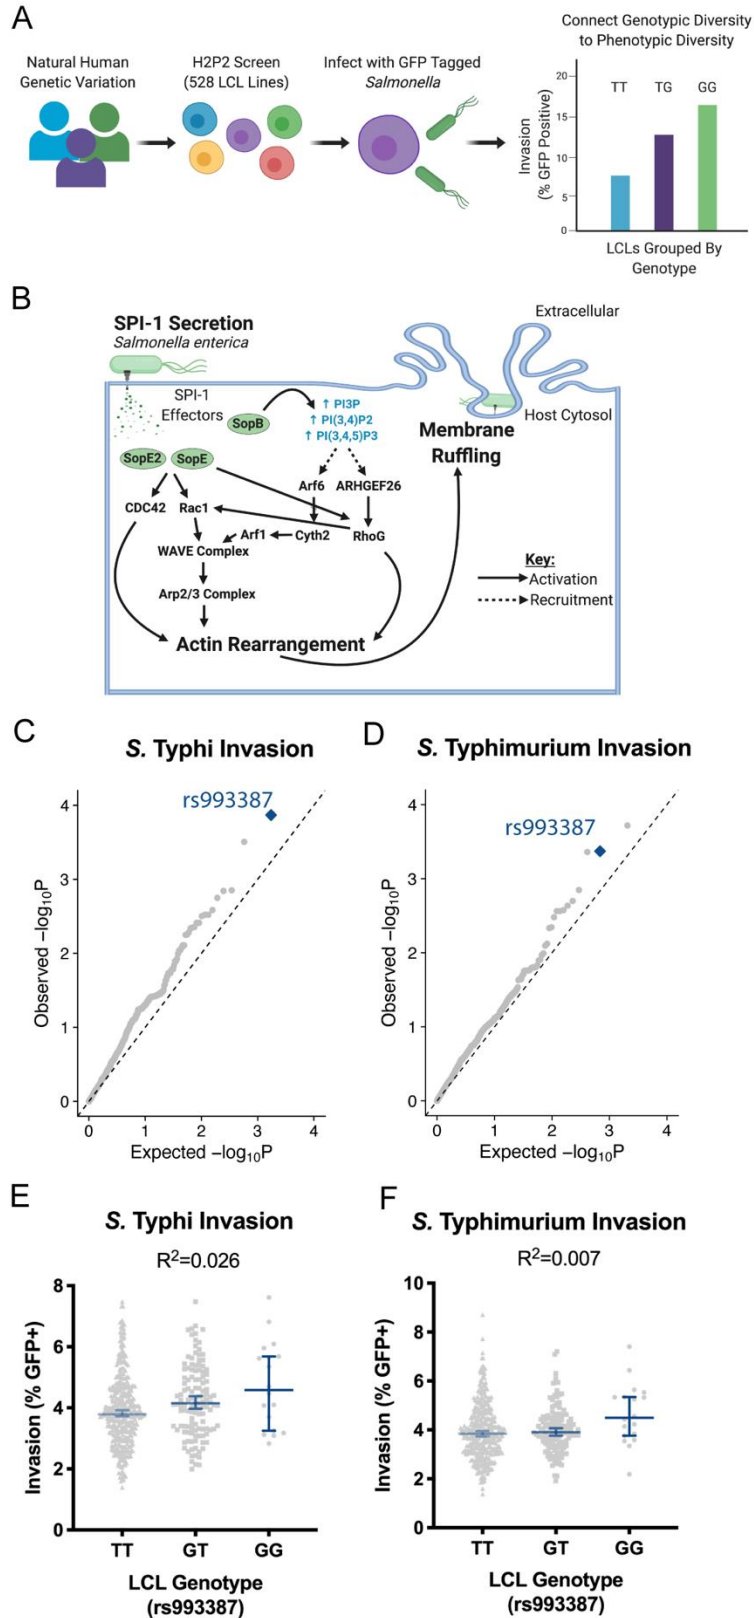

**Figure 1. H2P2 reveals the rs993387 locus is associated with *Salmonella* invasion of lymphoblastoid cell lines.**

(A) Schematic for the H2P2 cellular GWAS. 528 lymphoblastoid cell lines (LCLs) from four populations were infected with *S. Typhimurium* (MOI 30) or *S. Typhi* (MOI 5) for 1 hour. Invasion was quantified 3 hours post infection by flow cytometry. Percent invasion was used as a phenotype for GWAS analysis. (B) Schematic for SPI-1-mediated invasion. Genes and complexes listed are included in the stratified GWAS analysis. (C,D) Stratified QQ plots examining SNPs associated with *S. Typhi* (C) and *S. Typhimurium* (D) invasion. Only SNPs in SPI-1 invasion-associated host genes were considered and analysis was restricted to common SNPs ( $MAF > 0.05$ ) and pruned at  $r^2 > 0.6$ . rs993387 (blue diamond) diverges from p-values expected by chance for both serovars. Empirical P-values were calculated from family-based association analysis using QFAM-parents in PLINK. (E,F) Analysis of invasion for *S. Typhi* (E) and *S. Typhimurium* (F) from the H2P2 screen plotted by rs993387 genotype. Each dot represents a single LCL line, averaged between three independent experiments. Bar marks the median and the error bars represent the 95% confidence intervals.  $R^2$  values derived from simple linear regression. P values for both regressions were  $p \leq 0.05$ .



196 Manipulating *ARHGEF26* expression phenocopies the rs993387 locus' effect on  
197 *Salmonella* invasion

198         We next analyzed the rs993387 locus in detail and found that SNPs in a ~100kb  
199 region of linkage disequilibrium overlapping *ARHGEF26* were associated with both *S.*  
200 Typhi (Figure 2A) and *S. Typhimurium* (Figure 2B) invasion. Looking for plausible  
201 functional variants in high LD ( $r^2 > 0.6$  in EUR and AFR populations) in Haploreg (36)  
202 revealed only additional intronic variants. Further evaluation of published eQTL datasets  
203 (37, 38) did not reveal a definitive connection to *ARHGEF26* mRNA expression. Testing  
204 for enhancer activity of a ~5kb region including rs993387, exon 11, and rs2122363 (the  
205 lowest *S. Typhimurium* SNP (Figure 2B)) using a luciferase reporter plasmid (39)  
206 demonstrated roughly two-fold induction over the vector control but no allele-specific  
207 enhancer activity in HeLa cells (Figure S1D). Additional analysis of the GTEx database  
208 (37) revealed that rs993387 is a splicing QTL in multiple tissues, including the colon  
209 ( $p=1.1 \times 10^{-9}$ ), representing a plausible mechanism by which this SNP could regulate  
210 *ARHGEF26* protein abundance or function. In summary, while H2P2 implicated the  
211 *ARHGEF26* region in regulating susceptibility to *Salmonella* invasion, we do not yet know  
212 how genetic variation in this region affects *ARHGEF26* expression and/or function.

213         We next examined if *ARHGEF26* expression affects *Salmonella* invasion in LCLs.  
214 While previous reports have linked *ARHGEF26* to the induction of membrane ruffling (7),  
215 no study has demonstrated whether *ARHGEF26* contributes to host-cell invasion. This is  
216 an important distinction, as invasion does not always correlate with ruffling (40). RNAi  
217 knockdown of *ARHGEF26*, confirmed by qPCR (Figure S1E), showed reduced *S. Typhi*

218 and *S. Typhimurium* invasion—a phenotype similar to the protective rs993387 T-allele in  
219 LCLs (Figure 2C, D).

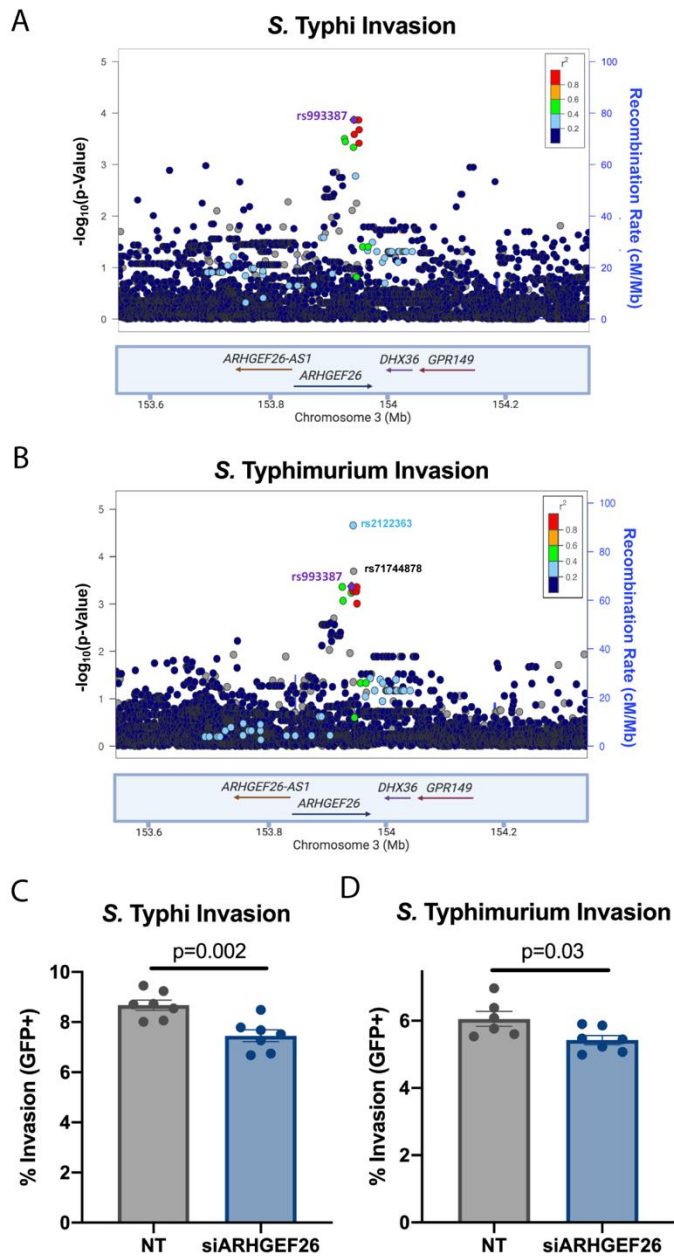

**Figure 2. Knockdown of ARHGEF26 phenocopies human genetic variation in the rs993387 locus.** (A,B) LocusZoom (41) plot generated with H2P2 data show SNPs in linkage disequilibrium with rs993387 in the *ARHGEF26* gene associates with *S. Typhi* (A) and *S. Typhimurium* (B) invasion. Height of dots represent the  $-\log_{10}(\text{p-value})$  from H2P2. Dot color represents linkage disequilibrium ( $r^2$ ) based on 1000 Genomes African dataset. Blue line behind dots tracks the recombination rate. (C,D) RNAi-mediated *ARHGEF26* knock down reduces *S. Typhi* (siARHGEF26/NT = 0.86, C) and *S. Typhimurium* (siARHGEF26/NT = 0.90, D) invasion in LCLs (HG01697, IBS, rs993387 genotype=GG) compared to non-targeting (NT) siRNA. Cells were infected at MOI 5 (*S. Typhi*) or MOI 30 (*S. Typhimurium*) for 60 minutes. Invasion was measured three hours post infection by flow cytometry. Each dot represents a biological replicate from one of three independent experiments. Experimental means were adjusted to the grand mean prior to plotting or performing statistics. Bars represent the mean and error bars represent standard error of the mean. P-values generated by an unpaired t-test.

253

254 ARHGEF26 effects on invasion are cell line and serovar dependent

255 To dissect how *ARHGEF26* contributes to *Salmonella* invasion, we examined how

256 the protein regulates *Salmonella* invasion of HeLa cells, a common epithelial invasion

257 model. We hypothesized that our core phenotypes of *ARHGEF26* positively regulating *S.*  
258 Typhi and *S. Typhimurium* invasion in LCLs would replicate in HeLa cells. To our surprise,  
259 *ARHGEF26* RNAi knockdown significantly reduced *S. Typhi* invasion into HeLa cells  
260 (Figure 3A) but did not affect *S. Typhimurium* invasion (Figure 3B). This revealed that  
261 invasion only depends on *ARHGEF26* in certain cell line and serovar combinations.

262 The prevailing model for *ARHGEF26* involvement in invasion is that *Salmonellae*  
263 use SopB to recruit ARHGEF26 and thereby activate RHOG, while SopE and SopE2  
264 independently and directly activate RHOG (7). Based on this, we speculated that SopE2  
265 (present in *S. Typhimurium* 14028s; absent in *S. Typhi* Ty2) might be a more potent  
266 activator of RHOG in HeLa cells than SopE (present in *S. Typhi* Ty2; absent in *S.*  
267 *Typhimurium* 14028s), and that this effector repertoire difference might explain our  
268 difference in *ARHGEF26*-dependent invasion. However, in an *S. Typhimurium* strain  
269 lacking SopE2 (leaving only SopB to drive invasion) there was no effect of *ARHGEF26*  
270 knockdown on invasion (Figure 3C). Notably, the *S. Typhimurium* 14028s and *S. Typhi*  
271 Ty2 SopB proteins are 98.4% identical on the amino acid level, so it is possible that the  
272 modest differences in sequence could account for the differential ARHGEF26  
273 requirement. A potentially more plausible hypothesis is that additional differences in the  
274 effector repertoires and/or invasion mechanisms of *S. Typhi* and *S. Typhimurium* enable  
275 *S. Typhimurium* to efficiently invade HeLa cells in the absence of *ARHGEF26*.

276

#### 277 *ARHGEF26* contributes to SopB- and SopE-mediated *Salmonella* invasion

278 We next tested the hypothesis that ARHGEF26 is required for SopB-mediated  
279 invasion, but not SopE-mediated invasion using  $\Delta$ *sopB* and  $\Delta$ *sopE* *S. Typhi*. Surprisingly,

280 *ARHGEF26* knockdown reduced both SopB- and SopE-mediated invasion (Figure 3D).  
281 With wild-type *S. Typhi*, we observe a robust reduction in invasion following *ARHGEF26*  
282 knockdown (siARHGEF26/NT = 0.68). We observed a more modest reduction in invasion  
283 following *ARHGEF26* knockdown with the  $\Delta$ sopB mutant (siARHGEF26/NT = 0.81),  
284 demonstrating that SopE-mediated invasion is less efficient without ARHGEF26. In  
285 contrast, with the  $\Delta$ sopE mutant, we saw almost no change in effect size  
286 (siARHGEF26/NT = 0.71), demonstrating that when only SopB is present, ARHGEF26  
287 has roughly the same proportional effect on invasion as when both effectors are present.  
288 Together, these data suggest that the previous model in which ARHGEF26 is recruited  
289 by only SopB is incomplete, and instead support a model in which ARHGEF26 contributes  
290 to both SopB- and SopE-mediated invasion.

291

#### 292 *RHOG* knockdown does not phenocopy *ARHGEF26* knockdown

293 We next tested whether the effects of *ARHGEF26* knockdown could be  
294 phenocopied by knocking down *RHOG*. Notably while Patel *et al.* showed that RHOG  
295 contributes to SopB-mediated membrane ruffling (7) and invasion (25), more recent  
296 reports have demonstrated that RHOG is dispensable for *Salmonella* invasion into  
297 fibroblasts (20) and Henle cells (19, 20). In line with this, we found that *RHOG* knockdown  
298 did not reduce *Salmonella* Typhi (Figure 3E) or Typhimurium (Figure 3F) invasion.  
299 Curiously, we found that *RHOG* knockdown actually subtly increased invasion.

300 We hypothesize that there are three non-mutually exclusive reasons why *RHOG*  
301 knockdown fails to phenocopy *ARHGEF26* knockdown. First, it is possible that 85%  
302 knockdown (Figure S1F) may not be sufficient to impair RHOG's cellular functions,

303 particularly in light of the small fraction of active RHOG in the cell at any given time (42-  
304 44). Alternatively, ARHGEF26-mediated invasion may involve other small GTPases. For  
305 instance, ARHGEF26 does show a weak capacity to stimulate nucleotide exchange of  
306 CDC42 and RAC1 *in vitro* (45, 46). Alternatively, ARHGEF26 could activate other CDC42-  
307 related small-GTPases, such as RHOJ, which have recently been shown to affect  
308 invasion (19, 47). Our third hypothesis is that ARHGEF26 may have impacts on  
309 *Salmonella* invasion independent of its GEF activity. This is based on work from one of  
310 our labs that demonstrated that some of ARHGEF26's cellular roles involve forming a  
311 tertiary complex with DLG1 and SCRIB independent of nucleotide exchange (48).

312

313

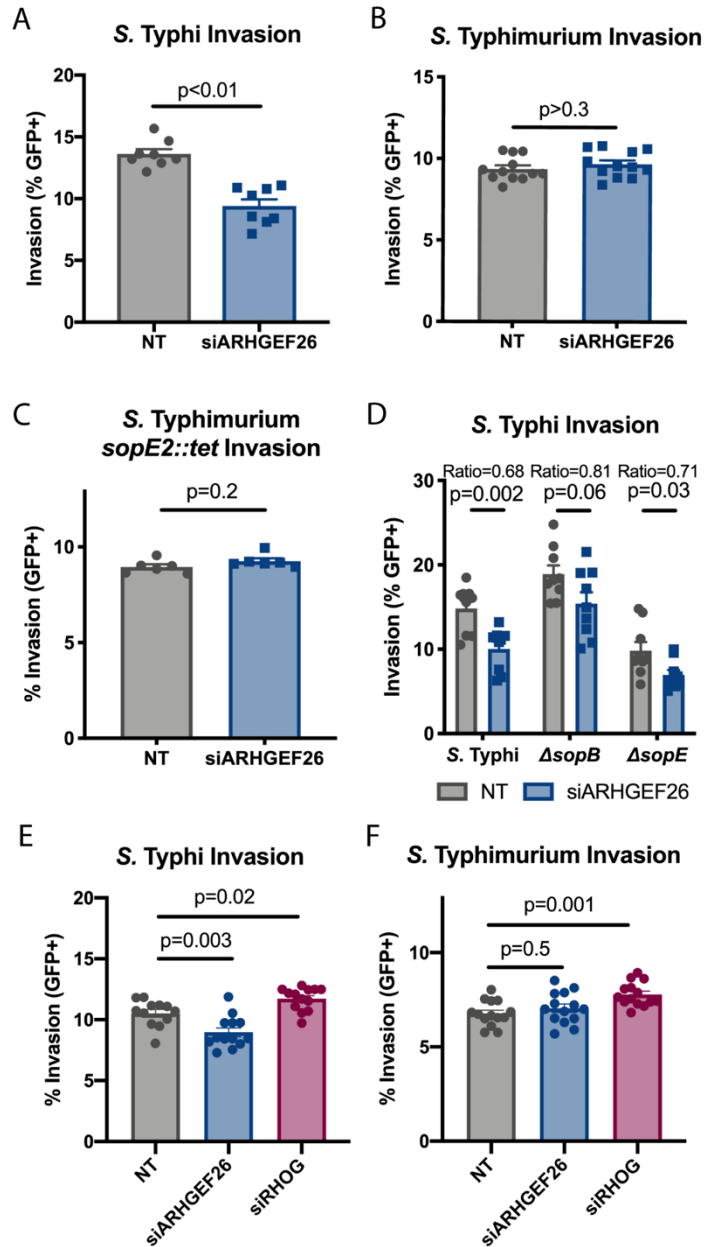

**Figure 3. *ARHGEF26* is a positive regulator of *Salmonella Typhi*, but not *Salmonella Typhimurium*, invasion into HeLa cells.** (A,B) RNAi knockdown of *ARHGEF26* in HeLa cells results in reduced *S. Typhi* (A), but not reduced *S. Typhimurium* (B) invasion. (C) The absence of an effect in *S. Typhimurium* is independent of *sopE2*, as a *S. Typhimurium* strain where the gene is replaced with a tetracycline resistance allele (*tet*) also shows no effect. (D) The effects of *ARHGEF26* knockdown on *S. Typhi* invasion does not require either *sopB* or *sopE*. (E, F) *RHOG* knockdown does not reduce *S. Typhi* or *S. Typhimurium* invasion. All comparisons are made to transfection with non-targeting (NT) siRNA. Cells were infected at MOI 30 (*S. Typhi*) or MOI 1 (*S. Typhimurium*) for 30 minutes. For all panels, invasion was measured three hours post infection by flow cytometry. All dots represent biological replicates from at least two experiments. Ratio in D is the siARHGEF26 mean divided by the NT mean. Data across experiments were normalized to the grand mean prior to plotting or performing statistics. Bars represent the mean and error bars represent standard error of the mean. P-values for panels A-D were generated by unpaired t-test. P-values for E-F were generated by one-way ANOVA with Dunnett's multiple comparisons test.

348

349 The Scribble Complex members DLG1 and SCRIB promote *S. Typhi* invasion

350 Previous work has demonstrated that the Scribble complex members DLG1 and/or  
 351 SCRIB play key roles facilitating *ARHGEF26* activity during human papillomavirus  
 352 infection (49), as well as in regulating epithelial junctions formation, contractability, and  
 353 lumen formation in 3D cysts (48). With this in mind, we investigated whether DLG1 and/or

354 SCRIB has a role in *Salmonella* invasion. Indeed, we observed that knockdown of *DLG1*  
355 and *SCRIB* each resulted in a reduction in *S. Typhi* invasion (Figure 4A).

356 Supporting our hypothesis that *DLG1*, *SCRIB*, and *ARHGEF26* may act through  
357 the same pathway, our findings with *DLG1* and *SCRIB* knockdown broadly phenocopy  
358 our results with *ARHGEF26* knockdown. Consistent with our *ARHGEF26* knockdown  
359 data, *DLG1* and *SCRIB* are dispensable for *S. Typhimurium* invasion (Figure 4B). Further,  
360 the effect of *DLG1* and *SCRIB* knockdown on invasion was partially reduced when cells  
361 were infected with  $\Delta$ *sopB* *S. Typhi* (Figure 4C, siDLG1/NT = 0.84,  $p=0.02$ ; siSCRIB/NT =  
362 0.87,  $p =0.09$ ) compared to infection with wild-type *S. Typhi* (Figure 4C, siDLG1/NT =  
363 0.76,  $p = 0.001$ ; siSCRIB/NT = 0.81,  $p < 0.001$ ), suggesting that SopE is more efficient at  
364 inducing invasion in the presence of *ARHGEF26*, *DLG1*, and *SCRIB*. However, unlike  
365 *ARHGEF26* knockdown, the effect of *DLG1* and *SCRIB* knockdown were largely ablated  
366 when cells were infected with  $\Delta$ *sopE* *S. Typhi* (Figure 4C, siDLG1/NT = 0.89; siSCRIB/NT  
367 = 0.90), demonstrating that *DLG1* and *SCRIB* have small and statistically insignificant  
368 impacts on SopB-mediated invasion. Our interpretation of this data is that *DLG1* and  
369 *SCRIB* may primarily help *ARHGEF26* drive SopE-mediated invasion, but that other  
370 scaffolds primarily assist in SopB-mediated invasion.

371  
372

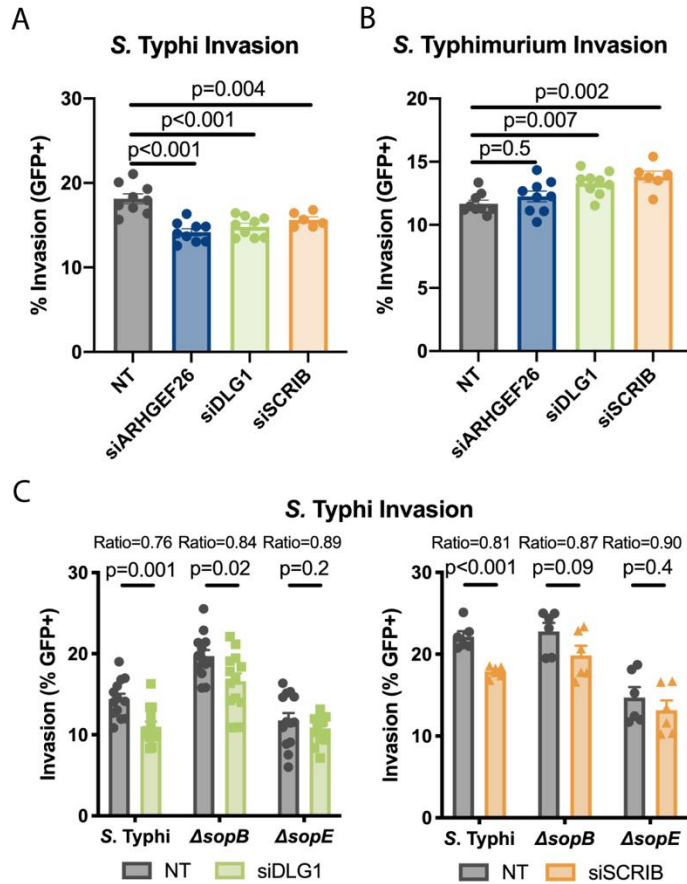

399

**Figure 4: ARHGEF26 interactors DLG1 and SCRIB contribute to S. Typhi invasion.** (A,B) RNAi knockdown of *DLG1* and *SCRIB* phenocopy the reduction in *S. Typhi* (A), but not *S. Typhimurium* (B) invasion that we observe with *ARHGEF26* knockdown. (C) *DLG1* and *SCRIB* knockdown significantly reduces wild-type *S. Typhi* and  $\Delta s o p B$  *S. Typhi* invasion, but not  $\Delta s o p E$  invasion. Cells were infected at MOI 30 (*S. Typhi*) or MOI 1 (*S. Typhimurium*) for 30 minutes. Circles represent non-targeting (NT) siRNA, squares siDLG1, and triangles siSCRIB treated wells. Invasion was measured three hours post infection by flow cytometry. All dots represent biological replicates from at least three experiments. Ratio in C represent the mean of invasion of siRNA treatment divided by the mean invasion of NT treatment. Data across experiments were normalized to the grand mean prior to plotting or performing statistics. Bars represent the mean and error bars represent standard error of the mean. P-values were generated by unpaired one-way ANOVA with Dunnett's multiple comparison test for A and B. For panel C p-values were generated by unpaired t tests.

400

401 The impacts of ARHGEF26 on *S. Typhi* invasion require GEF catalytic activity

402 Involvement of DLG1 and SCRIB in ARHGEF26-mediated *Salmonella* invasion  
 403 could be facilitated by one of two mechanisms. First, DLG1 and SCRIB could help  
 404 ARHGEF26 localize to the site of invasion in order to serve as a GEF, similar to how they  
 405 function to drive adherens junction formation (48). Alternatively, formation of the  
 406 ARHGEF26, DLG1, SCRIB tertiary complex could drive *Salmonella* invasion through  
 407 unknown and GEF-independent mechanisms, as one of our labs described for  
 408 actomyosin contractility (48). To distinguish between these possibilities, we assessed  
 409 which ARHGEF26 domains are required for *S. Typhi* invasion by structure-function  
 410 analysis (Figure 5A).



411 Overexpression of ARHGEF26, but not overexpression of a catalytically dead (CD)  
412 mutant (R446A, N621A), increased *S. Typhi* invasion (Figure 5B). Additionally,  
413 overexpression of mutants lacking the pleckstrin homology (PH) and/or the catalytic Dbl  
414 homology (DH) domain failed to induce invasion. All other domains were independently  
415 dispensable. While the DH and PH domains were necessary, they were not sufficient, as  
416 a DH-PH construct failed to induce invasion.

417 As catalytically active *ARHGEF26* overexpression induces spontaneous  
418 membrane ruffling and macropinocytosis, we next examined whether membrane ruffling  
419 and invasion could be decoupled. To do this, we overexpressed the *ARHGEF26*  
420 constructs and quantified the uptake of passive  $\Delta prgH$  *S. Typhi*, which cannot dock to  
421 host cells or induce invasion (Figure 5C), as well as the number of ARHGEF26+  
422 membrane ruffles present (Figure 5D, 5E). Across five of our six *ARHGEF26* mutants, we  
423 found strong correlations between *S. Typhi* invasion (Figure 5B),  $\Delta prgH$  *S. Typhi* invasion  
424 (Figure 5C), and membrane ruffling (Figure 5D, 5E). The one exception was our PH-DH  
425 mutant, which was not able to promote wild-type *S. Typhi* invasion but did modestly  
426 increase  $\Delta prgH$  *S. Typhi* invasion ( $p=0.08$ ) and induce small membrane ruffles. This  
427 indicates that the small ruffles are sufficient to drive  $\Delta prgH$  uptake but are an insignificant  
428 addition to the typical *S. Typhi* induced membrane ruffles. Overall, these data suggest  
429 that *ARHGEF26* overexpression affects invasion by increasing membrane ruffling and  
430 macropinocytosis.

431 We conclude that, under overexpression conditions, *ARHGEF26* constructs that  
432 do not show catalytic activity but are still able to bind DLG1 and SCRIB (48) are not able  
433 to drive *Salmonella* invasion. Thus, our RNAi and overexpression results support a model

434 where both interaction of DLG1/SCRIB and nucleotide exchange contribute to  
 435 ARHGEF26's role in promoting invasion.

436

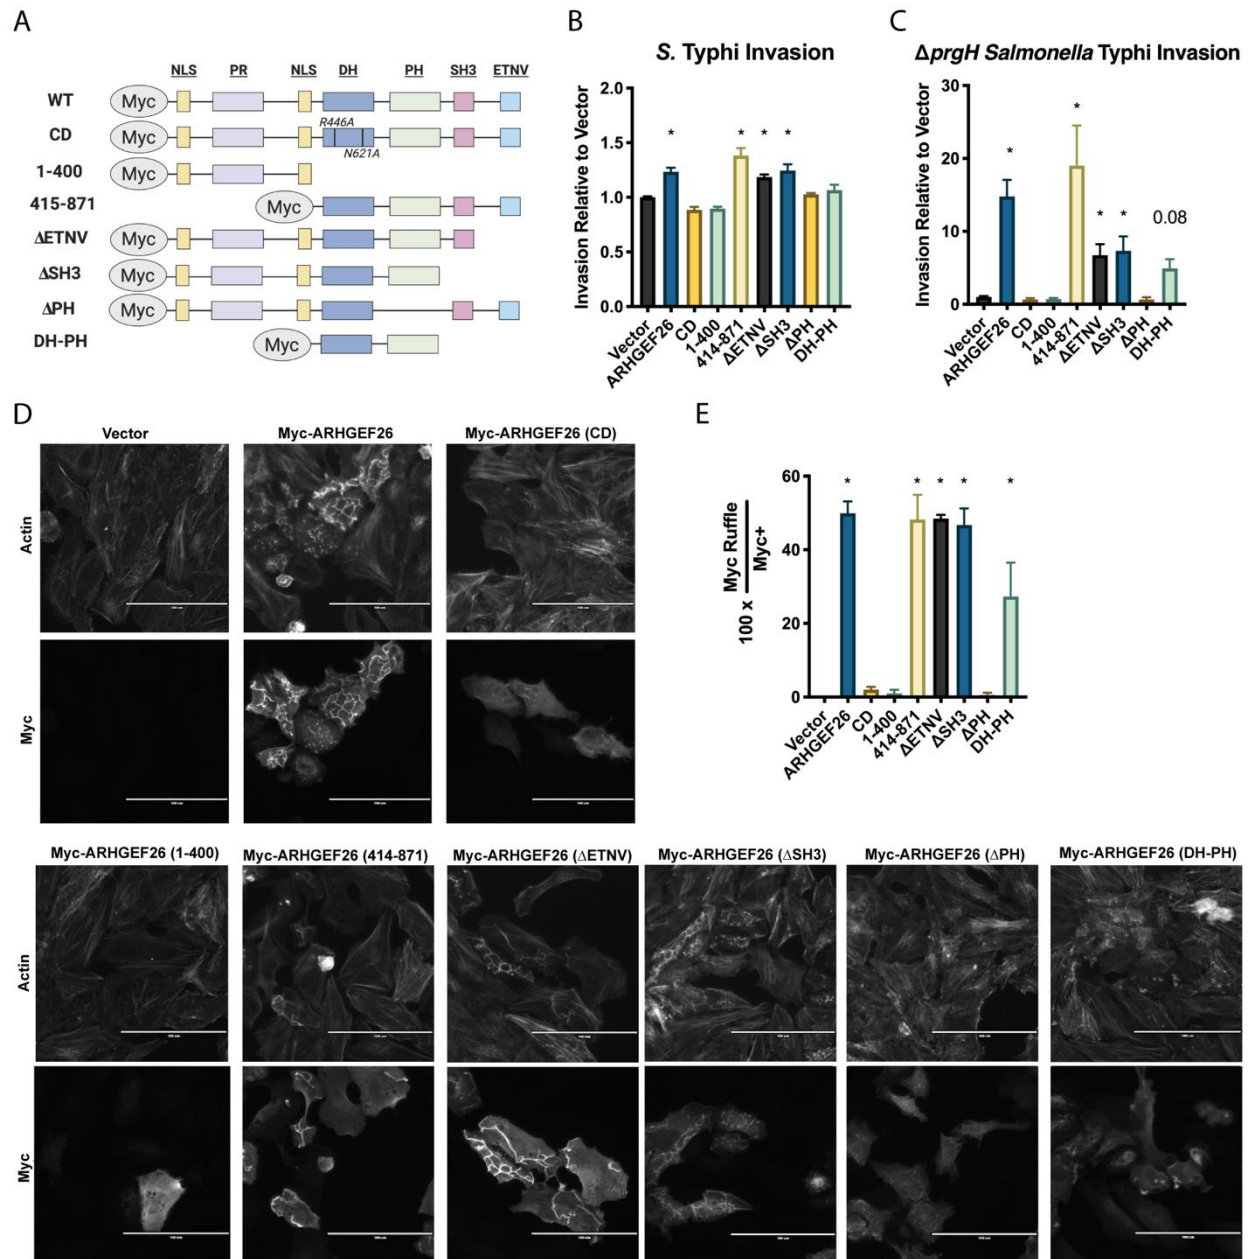

437

438 **Figure 5: ARHGEF26 DH and PH domains are required for ARHGEF26 to induce membrane ruffling and**  
 439 **Salmonella invasion in HeLa cells.** (A) Schematic of overexpression constructs used. (B,C) Overexpression of  
 440 ARHGEF26 constructs in HeLa cells results in increased wild-type *S. Typhi* invasion (B), as well as invasion of the  
 441 SPI-1 secretion mutant *ΔprgH S. Typhi* (C). Infections were performed at MOI 30 for 60 minutes and quantified  
 442 3 hours post infection by flow cytometry. Invasion is reported relative to vector and includes data from at least  
 443 three independent experiments with three replicates per experiment. \* represents a corrected p-value < 0.05.

444 P-values generated by Kruskal-Wallis test with Dunn's multiple comparison test. (D) *ARHGEF26* constructs able  
445 to induce invasion also induce membrane ruffling. Overexpression of catalytically active constructs in HeLas  
446 results in membrane ruffling that can be observed both with *ARHGEF26* staining using the Myc Tag, as well as  
447 by using phalloidin staining to observe actin. (E) Quantification of membrane ruffling confirms correlation with  
448 *ARHGEF26*-mediated invasion. Frequency of membrane ruffles was quantified as a percent of Myc+ cells that  
449 had a clear Myc+ ruffle. Ruffle abundance was quantified from four independent experiments. Values were  
450 generated by quantifying ruffles from five separate fields of view. The presence of a ruffle was confirmed by  
451 examining phalloidin stained actin at that site. Scale bar is 100  $\mu$ M. \* represents a p-value < 0.05. p-value  
452 generated by one-way ANOVA of the  $\log(X+1)$  transformed values with Dunnett's multiple comparisons test.  
453

#### 454 *ARHGEF26* does not show significant phosphoinositide binding using a dot blot assay

455 While our data suggest that *DLG1* and *SCRIB* may contribute to *ARHGEF26*  
456 localization, the prevailing model postulates that *ARHGEF26* is guided to the plasma  
457 membrane through its pleckstrin homology (PH) domain (7), which in some proteins can  
458 bind phosphoinositides (50). Under this model, *ARHGEF26* localization is regulated by  
459 SopB's effects on phosphoinositides (6, 7, 9, 21, 51-53). Supporting this, our data  
460 demonstrates that the *ARHGEF26* PH domain is required to increase invasion (Figure 5).  
461 However, many PH domains either completely lack canonical phosphoinositide binding  
462 or have phosphoinositide binding that is physiologically irrelevant (50, 54). Therefore, PH-  
463 dependence alone is insufficient to implicate SopB-generated phosphoinositides as this  
464 could suggest either that *ARHGEF26* binds phosphoinositides in order to function, or  
465 simply, that this mutation disrupts the catalytic domain as has been shown for other RHO  
466 GEFs (46).

467 To directly test whether *ARHGEF26* binds phosphoinositides, we performed a dot  
468 blot assay in which different phosphoinositide species are dotted on a membrane and  
469 exposed to *ARHGEF26*. Across a variety of conditions—including different *ARHGEF26*  
470 constructs, cellular sources of protein, and blocking solutions—we did not detect strong  
471 phosphoinositide binding (Figure S2). We also tested whether co-expression of

472 ARHGEF26 and RHOG could drive phosphoinositide binding, as occurs with the RHOG  
473 GEF Trio (55), but did not observe increased signal. Under some conditions, weak and  
474 non-specific signal appeared on the dots of some phosphoinositide species, but this was  
475 independent of the PH domain and difficult to distinguish from background noise. This  
476 contrasted with our positive control, the AKT-PH domain, which demonstrated robust and  
477 highly specific binding. By considering the difference in signal between the ARHGEF26  
478 constructs and AKT-PH domain, as well as the history of this assay exaggerating the  
479 affinity for proteins with phosphoinositides (56), we surmise that even if this signal is the  
480 result of a weak affinity for phosphoinositides, this affinity is unlikely to play any  
481 physiological role *in vivo*. Therefore, while we cannot firmly rule out that ARHGEF26 binds  
482 phosphoinositides using this assay, these data do not support PH domain-mediated  
483 phosphoinositide binding directing ARHGEF26 localization.

484         Together, our results suggest a new model for the role of *ARHGEF26* during *S.*  
485 *Typhi* epithelial cell invasion. We propose that ARHGEF26 potentially stimulates invasion  
486 independently of RHOG and that recruitment of ARHGEF26 to the site of invasion is not  
487 dependent on SopB-mediated phosphoinositide changes. Instead, our results  
488 demonstrate the SCRIB-DLG1-ARHGEF26 complex is important for invasion even with  
489 SopE stimulation being the primary route of invasion. Our results that *ARHGEF26*,  
490 *SCRIB*, and *DLG1* knockdown have their strongest effects when both SopB and SopE  
491 are present may suggest these effectors must work cooperatively to effectively enable  
492 ARHGEF26 to enhance invasion.

493

494 ARHGEF26 contributes to *S. Typhimurium*-induced inflammation in HeLa cells

495 In addition to enabling *Salmonella* invasion, interactions between the SPI-1  
496 secreted effectors and host machinery drive inflammation that is characteristic of  
497 *Salmonella* infections. For instance, during *Salmonella* invasion, SopB and SopE activate  
498 CDC42, which goes on to enable the formation of a PAK1–TRAF6–TAK1 complex, NF-  
499  $\kappa$ B activation, and increased IL-8 production (7, 57-61). Other work has suggested NOD2  
500 and RIPK2 also contribute to CDC42 and RAC1 mediated inflammation (62). Further,  
501 studies using dominant negative constructs have suggested that CDC42 and Rac1 are  
502 required for secretion of IL-8 from polarized cells *in vitro*, presumably through changes to  
503 the cytoskeleton (63). Based on our findings that ARHGEF26 is a critical GEF during  
504 *Salmonella* invasion, we hypothesized that it may also have a role in mediating  
505 *Salmonella*-induced inflammation.

506 To examine how ARHGEF26 contributes to inflammation, we knocked down  
507 *ARHGEF26* and *RHOG* in HeLa cells and measured IL-8 abundance in supernatant. In  
508 supernatant from uninfected cells, IL-8 was reduced following *ARHGEF26* or,  
509 interestingly, *RHOG* knockdown (Figure 6A). This suggests that even under basal  
510 conditions, ARHGEF26 regulates inflammation, potentially through interactions with  
511 RHOG.

512 Overexpression experiments confirmed the importance of ARHGEF26 and RHOG  
513 in regulating basal inflammatory cytokine production. *ARHGEF26* overexpression  
514 resulted in significantly increased IL-8 production (Figure 6B). Surprisingly, a partial effect  
515 was observed with overexpression of the catalytically dead construct (Figure 6B),  
516 demonstrating that ARHGEF26 does not require GEF activity to influence cytokine  
517 production. Overexpression of wild-type *RHOG* did not increase IL-8 in supernatant, but

518 overexpression of a constitutively active *RHOG* construct resulted in very robust cytokine  
519 production (Figure 6B). Together, our knockdown and overexpression data demonstrate  
520 that ARHGEF26 promotes inflammatory cytokine production and involves both GEF-  
521 dependent and GEF-independent mechanisms.

522 We next sought to examine whether ARHGEF26 regulates inflammation during  
523 *Salmonella* infection. Infection with *S. Typhi* caused induction of IL-8, but levels were  
524 moderately lower in supernatants with *ARHGEF26*, but not with *RHOG* knockdown  
525 (Figure 6C). This aligned with what we observed with invasion, suggesting either that  
526 related mechanisms could be contributing to ARHGEF26-mediated invasion and  
527 inflammation, or that reduced inflammation is driven by reductions in invasion. However,  
528 in contrast to our invasion data, we found that *ARHGEF26*, but not *RHOG*, knockdown  
529 also moderately reduced IL-8 abundance following *S. Typhimurium* infection (Figure 6D).  
530 This suggests that *S. Typhimurium*-mediated ARHGEF26-enhanced IL-8 production is  
531 invasion independent. Together, these data demonstrate that ARHGEF26 and RHOG  
532 have context specific roles through which they promote inflammation in HeLa cells.

533

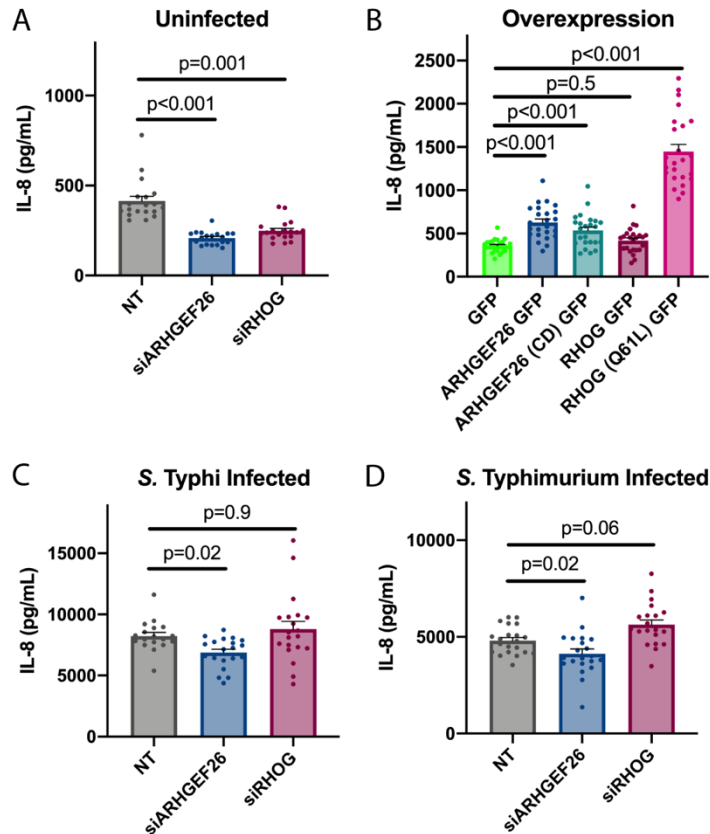

**Figure 6: ARHGEF26 and RHOG are context-dependent enhancers of IL-8 abundance in HeLa cell supernatant.** (A) *ARHGEF26* and *RHOG* knockdown results in less IL-8 secretion into HeLa supernatant than non-targeting (NT) siRNA. Media was changed two days post transfection supernatant was collected 8 hours later. (B) Overexpression of *ARHGEF26* and *RHOG* in HeLa cells increases IL-8 cytokine abundance in supernatant. Media was changed on transfected cells 18-24 hours post transfection and supernatant was collected 6 hours later. (C, D) *ARHGEF26*, but not *RHOG*, knockdown reduces IL-8 abundance in supernatant following *S. Typhi* infection (C) and *S. Typhimurium* infection (D). For C and D, cells were infected two days post transfection. Cells were infected with *S. Typhi* (MOI 30) or *S. Typhimurium* (MOI 1) for one hour before gentamycin addition. Media was changed two hours before infection and supernatant was collected six hours after infection. Cytokine abundance was

559 measured by ELISA. For all graphs, dots represent a single well and data were collected across seven  
560 independent experiments. Data were normalized to the grand mean prior to plotting or performing statistics.  
561 For (C), two outliers identified by ROUT ( $Q=0.1\%$ ) were removed from the non-targeting group. These values  
562 (17,924 pg/mL and 22,083 pg/mL) inflated the mean of the NT group, making the ARHGEF26 effect size  
563 artificially large, and the p-value artificially low ( $p=0.002$ ). P-values were calculated using a one-way ANOVA  
564 with Dunnett's multiple comparison test on the  $\log_2$  transformed data. For all graphs central tendency is the  
565 mean, error bars are the standard error of the mean.  
566

## 567 ARHGEF26 is required for *S. Typhimurium* virulence during an enteric fever model of 568 infection

569 Following these results, it was crucial to define ARHGEF26's role in *Salmonella*  
570 pathogenesis in mice. As *S. Typhi* is a human specific pathogen, we focused specifically  
571 on how ARHGEF26 influences murine *S. Typhimurium* pathogenesis. Based on the data  
572 from H2P2 and LCL knockdown, we hypothesized that ARHGEF26 is required for SPI-1  
573 mediated establishment of *S. Typhimurium* in the mammalian gut. To test this hypothesis,  
574 we utilized *Arhgef26*<sup>-/-</sup> C57BL/6J mice (64) to assess the ability of *S. Typhimurium* to

575 establish infection using the oral enteric fever model of infection (Figure 7A). In this model,  
576 SPI-1 secretion is required for *S. Typhimurium* colonization and persistence in the  
577 mammalian ileum and helps facilitate *S. Typhimurium* dissemination to the spleen (3). In  
578 support of our hypothesis that *Arhgef26* promotes invasion *in vivo*, *Arhgef26*<sup>-/-</sup> mice  
579 showed significantly lower *S. Typhimurium* burdens in the ileum, but this effect was  
580 considerably smaller in the spleen (Figure 7B).

581 As *Arhgef26*<sup>-/-</sup> mice phenocopy the effects of SPI-1 knockout on ileal burden, we  
582 next examined whether the effect of *Arhgef26* knockout requires SPI-1. To genetically  
583 test this hypothesis, wild-type and *Arhgef26*<sup>-/-</sup> mice were infected with wild-type,  $\Delta$ *sopB*,  
584 and  $\Delta$ *prgH* *S. Typhimurium*. Supporting that a functional SPI-1 secretion system is  
585 required for ARHGEF26 to affect *S. Typhimurium* fitness, the difference in burden  
586 between wild-type and *Arhgef26*<sup>-/-</sup> mice was significantly reduced when mice were  
587 infected with  $\Delta$ *prgH* bacteria (Figure 7C). Notably, a few *Arhgef26* knockout mice did  
588 show  $\Delta$ *prgH* ileal burdens below the limit of detection, possibly suggesting an additional  
589 yet inconsistent level of resistance in these mice. This could be the result of reduced  
590 uptake of bacteria by phagocytes, as a previous screen reported that *ARHGEF26* is  
591 required for *Salmonella* uptake by macrophages (65). Interestingly, we also observe a  
592 reduced effect of *Arhgef26* deletion on bacterial fitness with the  $\Delta$ *sopB* mutant (Figure  
593 7C). Interestingly, this is reminiscent of the smaller phenotype of  $\Delta$ *sopB* *S. Typhi* with  
594 *ARHGEF26* RNAi in HeLa cells.

595

596



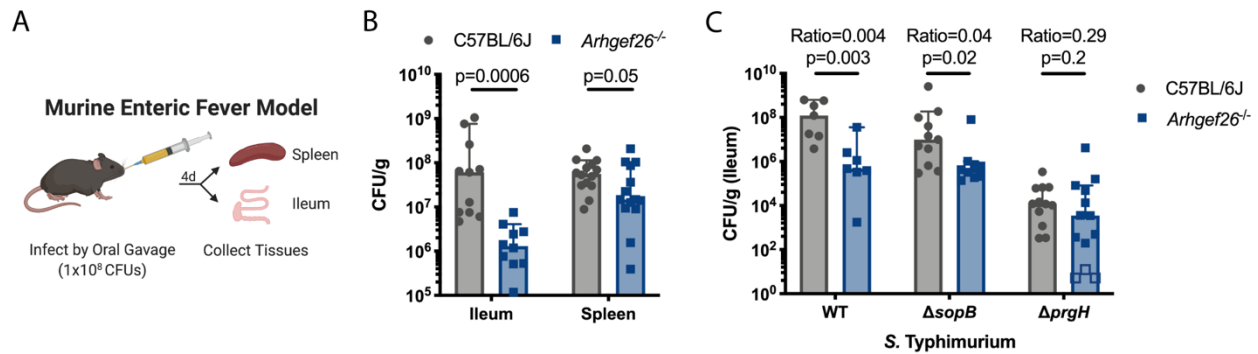

597

598 **Figure 7. *Arhgef26* is critical during *S. Typhimurium* infection in the enteric fever murine model.** (A) Schematic  
599 of the murine enteric fever infection model. (B) *Arhgef26*<sup>-/-</sup> mice have reduced ileal and splenic bacterial burden  
600 in the enteric fever infection model compared to C57BL/6J mice. P-values generated by two-way ANOVA with  
601 Sidak's multiple comparison test. (C) Effects of *Arhgef26* knockout on bacterial fitness depends on *sopB* and  
602 *prgH*. Open boxes represent mice where no colony forming units (CFU) were recovered from *ARHGEF26*<sup>-/-</sup> mice  
603 and the CFU/g was set to the limit of detection. Ratio represents median CFU/g recovered from *Arhgef26*<sup>-/-</sup>  
604 mice divided by the median CFU/g recovered from C57BL/6J mice. P-values were generated by unpaired t-  
605 tests. For all experiments, mice were infected with 1x10<sup>8</sup> *S. Typhimurium* CFU and tissues were harvested four  
606 days post infection for CFU quantification. For all bar graphs, each dot represents a single mouse from one of  
607 at least two experiments, bars represent the median, and error bars represent the 95% confidence interval.  
608 All mice were age and sex matched within experiments, with both sexes represented in all experiments.  
609

## 610 ARHGEF26 contributes to inflammation during a gastroenteritis model of *S. Typhimurium* 611 infection

612 While SPI-1 contributes significantly to the colonization and survival of *S.*  
613 *Typhimurium* in the ileum in the enteric fever model of infection, this is not the natural  
614 progression of most *S. Typhimurium* illness in humans. Instead, *S. Typhimurium* typically  
615 causes severe gastroenteritis and diarrheal disease, with notable exceptions (66). To  
616 model this natural disease progression in mice, microbiota must be reduced with  
617 streptomycin pretreatment prior to infection (11) (Figure 8A). Interestingly, in this model,  
618 SPI-1 secretion does not impact bacterial burden at early timepoints but instead drives  
619 severe inflammation (10, 11). As we have demonstrated that ARHGEF26 is a regulator  
620 of the cytokine response (Figure 6), we examined whether ARHGEF26 promoted SPI-1  
621 mediated pathology by infecting wild-type and *Arhgef26*<sup>-/-</sup> mice following streptomycin

622 pretreatment. Indeed, there was no effect of *Arhgef26* deletion on the recovery of *S.*  
623 Typhimurium from ileum, cecum, or colon two days post infection (Figure 8B), but these  
624 sites demonstrated significantly reduced inflammation-associated pathology in *Arhgef26*<sup>-/-</sup>  
625 mice (Figure 8C, 8D). This was most striking in the cecum and colon where inflammation  
626 is most severe in wild-type mice. The data from both models demonstrate that  
627 ARHGEF26 plays a critical, multifaceted role in enabling *S. Typhimurium* to utilize the  
628 SPI-1 secretion system to cause disease during murine infection.

629

630

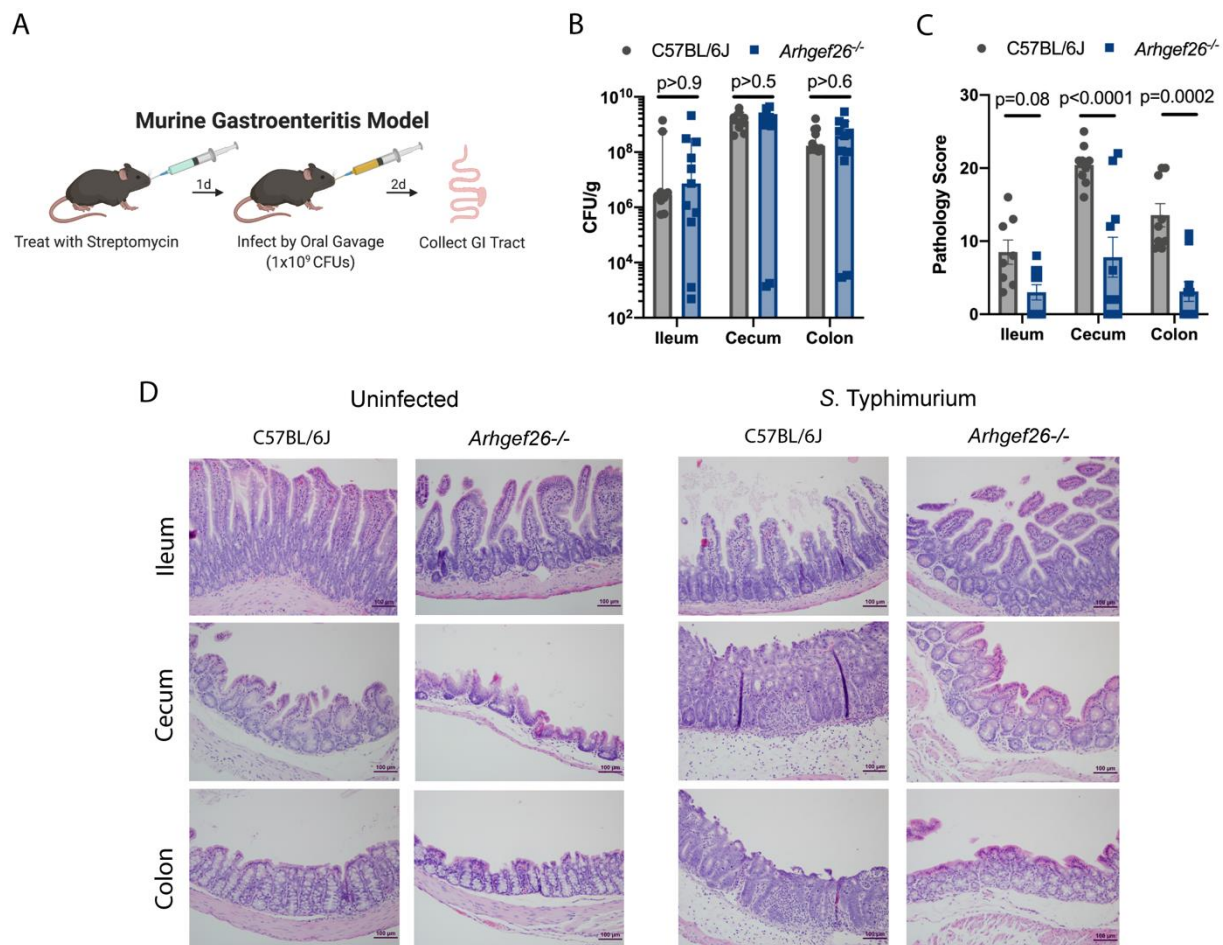

631

632 **Figure 8. *Arhgef26* enhances inflammation in mice.** (A) Schematic for murine gastroenteritis infection model.  
633 Mice are pretreated with streptomycin one day before infection with 1x10<sup>9</sup> *S. Typhimurium* CFUs. Tissues are

634 collected 2 days post infection for CFU quantification or histological analysis. (B) *Arhgef26*<sup>-/-</sup> mice have no  
635 reductions in gastrointestinal tract bacterial burdens in the gastroenteritis infection model. (C) *Arhgef26*<sup>-/-</sup> mice  
636 have significantly reduced inflammation following infection compared to C57BL/6J mice in the gastroenteritis  
637 infection model. Pathology scores were generated in a blinded fashion by a trained pathologist and are broken  
638 down in Supplemental File 1. For B and C, each dot represents a single mouse from one of two experiments,  
639 bars represent the median and error bars represent the 95% confidence interval. All mice were age- and sex-  
640 matched within and across experiments. P-Values generated by two-way ANOVA with Sidak's multiple  
641 comparison test. (D) Examples of differential pathology following infection between C57BL/6J and *Arhgef26*<sup>-/-</sup>  
642 mice. Scale bar is 100  $\mu$ M.  
643

## 644 **Discussion**

645 Beginning with a candidate pathway approach paired with the Hi-HOST cellular  
646 GWAS platform, we identified a QTL in the *ARHGEF26* gene that influences host cell  
647 invasion, carried out functional studies that reshape our understanding of how  
648 ARHGEF26 stimulates invasion, and revealed a new role for ARHGEF26 in regulating  
649 inflammation in cells and mice.

650 One important question moving forward is how the rs993387 locus contributes to  
651 *Salmonella* invasion. As noted, published eQTL datasets have not provided a consistent  
652 answer for the association of rs993387 with *ARHGEF26* mRNA levels (37). This  
653 inconsistency is likely driven by the fact that while ARHGEF26 expression is detectable  
654 based on quantitative PCR ( $C_T \sim 30$ ) and RNA-seq datasets in LCLs (38, 67), it is a low  
655 abundance transcript. Additionally, we have not been able to reliably detect protein levels  
656 using either antibodies or mass spectrometric approaches. Of note, there is an  
657 ARHGEF26 anti-sense transcript (*ARHGEF26-AS1*) whose expression is associated with  
658 rs993387 in some tissues (most strongly in tibial nerve  $p=6.9 \times 10^{-22}$ ) (37). Also rs993387  
659 is reported as an *ARHGEF26* splicing QTL in both sigmoid ( $p=1.1 \times 10^{-9}$ ) and transverse  
660 colon ( $p=5.4 \times 10^{-5}$ ) (37, 38). Thus, though there are several plausible mechanisms, we do  
661 not know if rs993387 (or a causal variant in LD) affects ARHGEF26 mRNA levels, splicing,

662 protein levels, or protein function, and such experiments have been technically  
663 challenging.

664 A second unanswered question is how natural variation regulating *ARHGEF26*  
665 could impact invasion. Small changes in *ARHGEF26* expression or function could change  
666 the rate of membrane ruffling as we observe in the knockdown and overexpression  
667 systems. Alternatively, changes in *ARHGEF26* could impact the size of membrane ruffles  
668 and the efficiency with which macropinocytosis occurs at the site of invasion. A  
669 comparable phenomenon is observed with our overexpression system, as constructs with  
670 low activity (e.g. the DH-PH construct) form small, contained ruffles (Figure 5D). In  
671 contrast, other constructs (e.g. the 414-871 construct) form large ruffles that were able to  
672 increase *S. Typhi* and  $\Delta prgH$  *S. Typhi* invasion to levels even above what we observe  
673 with wild-type *ARHGEF26* overexpression (Figure 5B, 5C). Changing the size of  
674 membrane ruffles could have impacts beyond simply enabling the ARHGEF26-recruiting  
675 bacteria to invade the cell, as previous work has demonstrated that *Salmonella* swimming  
676 at the cell surface use membrane ruffling induced by other bacteria as a signal to begin  
677 their own invasion, thus engaging in a sort of cooperative behavior (68). Thus, large  
678 ARHGEF26-induced membrane ruffles could serve as a mechanism for (a) efficient  
679 macropinocytosis, and (b) cooperative host cell invasion.

680 Our work has also expanded understanding of ARHGEF26-mediated invasion by  
681 demonstrating that the protein has serovar and cell line dependent roles in *Salmonella*  
682 invasion, and that it appears to contribute to both SopB- and SopE- mediated invasion.  
683 This may indicate a context-dependent role for ARHGEF26 and raises a number of  
684 technical and conceptual questions. At present, we are unsure why this serovar specific

685 interaction occurs, but our data suggest that it is independent of SopE and SopE2.  
686 Further, that serovar specificity occurs in the canonical *Salmonella* invasion model  
687 (HeLas), but not in LCLs, raises additional questions broadly about how representative  
688 HeLa cells are for studying invasion. Supporting this, our murine data, in which *S.*  
689 Typhimurium had a SPI-1 dependent fitness deficit in *Arhgef26*<sup>-/-</sup> mice (Figure 7C), are  
690 more consistent with our results from H2P2 (Figure 1F) and siRNA in LCLs (Figure 2D)  
691 than our HeLa cell data (Figure 3B). This reinforces a recent observation that there are  
692 striking differences in the invasion mechanisms observed in canonical tissue culture  
693 models compared to those observed *in vivo* (69, 70). These data serve as a reminder that  
694 host-pathogen biology is more complex than any one strain-cell line interaction but  
695 instead must be considered from an array of perspectives.

696 Another important question arising from our work is how ARHGEF26 localizes to  
697 the site of invasion during infection. Previous work speculated that ARHGEF26 binds  
698 phosphoinositides through its PH domain (7), however, our results do not support this  
699 model. Instead, we hypothesize that the previously described SCRIB-DLG1-ARHGEF26  
700 complex (48) guides the GEF to the plasma membrane, possibly through DLG1's ability  
701 to bind phosphoinositides (71). While phosphoinositide-binding plays a central role in both  
702 models, it is important to note that the former model was based on the premise that  
703 ARHGEF26 is involved in SopB-, but not SopE-mediated invasion. Instead, our data  
704 suggest that SopB and SopE cooperatively guide ARHGEF26 to the site of invasion,  
705 enabling ARHGEF26 to contribute to both SopB- and SopE-mediated invasion. How  
706 SopE contributes to this process is a mystery. It could be that SopE-mediated changes  
707 to phosphoinositides (9) are able to recruit the complex to the membrane, or some other

708 positive feedback system may exist following SopE-mediated nucleotide exchange.  
709 Further, our data suggest that scaffolds other than DLG1 and SCRIB may be involved  
710 specifically in bringing active *ARHGEF26* to the SopB-induced membrane ruffle. Perhaps  
711 this DLG1/SCRIB-independent mechanism involves post-translational modifications to  
712 *ARHGEF26*, which have previously been reported to regulate *ARHGEF26* activity (72).

713 The utilization of both a host and pathogen protein with similar functions  
714 (*ARHGEF26* and SopE) to stimulate invasion is an unexpected and fascinating  
715 observation. Bacterial effectors that mimic host proteins often outperform their  
716 mammalian counterparts in order to promote pathogenesis (73, 74). That *S. Typhi*  
717 benefits from both the SopE GEF mimic and *ARHGEF26* being present in HeLa cells is  
718 a striking exception to this paradigm, but not unheard of. Indeed, previous work has  
719 demonstrated that SopE acts cooperatively with the host GEF ARNO (CYTH2) to activate  
720 the WAVE complex and induce invasion (23). As we and others (19, 20) have provided  
721 evidence that RHO G may be dispensable for invasion, one potential reason for this  
722 cooperation may be differences in substrate specificity between SopE and *ARHGEF26*.  
723 Therefore, identifying the GTPase(s) that *ARHGEF26* activates during infection  
724 represents an important future direction. One potential GTPase is RHOJ (also called  
725 TCL), a GTPase that has high homology to CDC42 (47) and is important *Salmonella*  
726 invasion (19). Little is known about RHOJ regulation, though its N-terminus has been  
727 shown to be critical for localization to the plasma membrane and for nucleotide exchange  
728 (75, 76). Future work will examine whether *ARHGEF26* can facilitate nucleotide exchange  
729 with this or other GTPases.

730 Finally, we demonstrated that ARHGEF26 contributes to *S. Typhimurium* fitness  
731 in the enteric fever mouse model, as well as to *S. Typhimurium*-induced inflammation in  
732 the streptomycin pretreatment gastroenteritis model. This latter observation was  
733 surprising, as no report has shown *ARHGEF26* may promote proinflammatory processes,  
734 and in fact, some have speculated that it may be involved in anti-inflammatory processes.  
735 This is due to its relatively high levels in M2 macrophages (77) as well as its ability to  
736 suppress muramyl dipeptide-induced IL-8 production in NOD2 expressing HEK293 cells  
737 (78). While initially this latter finding appears to conflict with our results, we instead believe  
738 it merely reinforces a point implied by our data: ARHGEF26 has highly context dependent  
739 roles in regulating inflammation. For instance, ARHGEF26 is a strong regulator of IL-8  
740 abundance in uninfected supernatant, but only a moderate regulator in *S. Typhi* and *S.*  
741 *Typhimurium* infected supernatant. The regulatory network is complicated further by our  
742 finding that ARHGEF26 likely regulates cytokine abundance through RHOG dependent  
743 and GEF independent mechanisms.

744 We speculate that there are two mechanisms by which ARHGEF26 could  
745 contribute to inflammation in the mouse gut. First, ARHGEF26 could impact  
746 proinflammatory cytokine release, as we observe in HeLa cells. Second, as ARHGEF26  
747 has been shown to play a role in cell migration (72, 79), we speculate that *Arhgef26*<sup>-/-</sup>  
748 mice may have reduced immune cell migration to the gut, leading to improved  
749 pathophysiology. Determining the role of ARHGEF26 during inflammation could have  
750 interesting implications on human health, as inhibiting ARHGEF26 and/or RHOG could be  
751 a means of reducing inflammation-driven disease.

752

753 **Acknowledgements and Funding**

754 We would like to thank Alyson Barnes, Ben Schott, Alejandro Antonia, Sarah  
755 Jaslow, Kelly Pittman, Rachel Keener, and all other past and present members of the Ko  
756 Lab for their support throughout this project. In particular, we thank Kyle Gibbs for his  
757 thorough editing of this manuscript and frequent contributions to experimental design. We  
758 thank Dr. Keith Burridge for early discussion on ARHGEF26 and a gift of *Arhgef26*<sup>-/-</sup> mice.  
759 We also thank Dr. Stacy Horner and the Duke MGM Department for use of equipment.  
760 All schematic images were generated using Biorender.com. The *S. Typhimurium*  
761 *sopE::tet* strain was a gift from Heather Felise.

762 JSB was supported by National Institutes of Health 1F31AI143147. JSB, MIA, LW,  
763 and DCK were supported by National Institutes of Health R01AI118903 and  
764 R21AI144586. SA and RGM were supported by National Institutes of Health  
765 R01GM136826. The funders played no role in the study design, data collection and  
766 analysis, decision to publish, or preparation of the manuscript.

767

768 **Competing Interests:** The authors have declared that no competing interests exist.

769

770 **Methods**

771 **Ethics Statement**

772 Work involving human lymphoblastoid cell lines has been reviewed by Duke Institutional  
773 Review Board and deemed to not constitute Human Subjects Research (Pro00044583,  
774 “Functional genetic screens of human variation using lymphoblastoid cell lines”). Mouse  
775 studies were carried out with approval by the Duke Institutional Animal Care and Use



776 Committee (A145-18-06, “Analysis of genes affecting microbial virulence in mice”) and  
777 adhere to the *Guide for the Care and Use of Laboratory Animals* of the National  
778 Institutes of Health.

779

#### 780 Mammalian and Bacterial Cell Culture

781 HapMap LCLs (Coriell Institute) were cultured at 37°C in 5% CO<sub>2</sub> in RPMI 1650  
782 media (Invitrogen) supplemented with 10% FBS (Thermo-Fisher), 2 μM glutamine, 100  
783 U/mL penicillin-G, and 100 mg/mL streptomycin. HeLa cells (Duke Cell Culture Facility)  
784 and Hek293T (Duke Cell Culture Facility) were grown in high glucose DMEM media  
785 supplemented with 10% FBS, 1mM glutamine, 100 U/mL penicillin-G, and 100mg/mL  
786 streptomycin. Cells used for *Salmonella* gentamicin protection assays were grown without  
787 antibiotics at least one hour prior to infection.

788 All *Salmonella* strains are derived from the *S. Typhimurium* strain 14028s or *S.*  
789 Typhi strain Ty2 and are listed in Table S2, and all plasmids are listed in Table S3. All  
790 knockout strains were generated by lambda red recombination (80). For infection of cells  
791 or mice, bacteria were grown overnight in LB broth (Miller formulation, BD), subcultured  
792 1:33 in 1mL cultures, and grown for an additional two hours and forty minutes at 37°C  
793 shaking at 250 RPM. Strains with temperature sensitive plasmids were grown at 30°C  
794 and plasmids removed at 42°C. Ampicillin was added to LB at 100 μg/mL, kanamycin at  
795 50 μg/mL.

796

#### 797 *Salmonella* Infection Assays

798 Infection assays were performed as previously described (17). Briefly, cells were  
799 infected with *S. Typhimurium* (LCLs MOI 30, 60 minutes infection. HeLa MOI 1, 30 minute  
800 infection, unless otherwise noted) or *S. Typhi* (LCLs MOI 10, 60 minute infection. HeLa  
801 MOI 30, 30 minute infection, unless otherwise noted). Post infection, cells were treated  
802 with 50  $\mu\text{g}/\text{mL}$  gentamicin. Two hours post infection, IPTG was added to induce GFP  
803 expression. Three hours and fifteen minutes post infection, cells were stained with 7-  
804 aminoactinomycin D (Biomol) and analyzed on a Guava EasyCyte Plus flow Cytometer  
805 (Millipore). Percent invasion was measured by quantifying the percent of GFP+ cells.

806

#### 807 Cellular GWAS Screen

808 Phenotypic screening in H2P2 on 528 LCLs and family-based GWAS analysis was  
809 performed using QFAM-parents with adaptive permutation in PLINK v1.9 (81) as  
810 previously described (17). All analyzed GWAS data is available through the H2P2 web  
811 atlas (<http://h2p2.oit.duke.edu/H2P2Home/>) (17). QQ plots were plotted using quantile-  
812 quantile function in R.

813

#### 814 Dual Luciferase Assay

815 The ARHGEF26 locus identified by H2P2 was cloned from the heterozygote  
816 HG02860 (population = Gambian and Western Divisions in the Gambia) into the pBV-  
817 Firefly Luciferase plasmid (39) by cut and paste cloning. The plasmid map is available  
818 here: <https://benchling.com/s/seq-2427vsVPRqxsgOj5NM7P>. Firefly luciferase plasmids  
819 and the Renilla luciferase plasmid pRL-SV40P (39) were co-transfected at a ratio of 50:1  
820 into HeLa cells using the Lipofectamine 3000 kit (Thermo) according to manufacturer

821 instructions. 48 hours post transfection, cells were lysed and analyzed for luciferase  
822 activity using the Dual-Luciferase Reporter Assay System (Promega). Luciferase activity  
823 was measured by a Synergy H1 plate reader (BioTek).

824

#### 825 siRNA Knockdown and Knockdown Confirmation

826 LCL (HG01697) knockdown was achieved by plating at 250,000 cells/well in a six  
827 well dish in 500  $\mu$ L of Accell media (Dharmacon) with either non-targeting Accell siRNA  
828 #1 or an Accell *ARHGEF26* SMARTpool (1  $\mu$ M total siRNA; Dharmacon). After 3 days,  
829 cells were resuspended in RPMI at 50,000 cells/well in a 96 well dish.

830 HeLa knockdown was performed using the following siRNA: siGenome Non-  
831 Targeting #5 or a siGENOME SMARTpool targeting *ARHGEF26*, *SCRIB*, *RHOG*, or  
832 *DLG1* (Horizon). siRNA were transfected into HeLa cells using the RNAi Max kit (Thermo)  
833 according to manufacturer instructions. Assays were performed forty-eight hours post  
834 infection as described above.

835 Simultaneously, knockdown was confirmed in each experiment by qPCR (Figure  
836 S1F). Briefly, RNA was harvested using a RNeasy kit (Qiagen), cDNA was generated  
837 with iScript (Bio-Rad), and qPCR was performed by using iTaq Universal Probes  
838 Supermix (Bio-Rad) and a QuantStudio 3 thermo cycler (Applied Biosystems). Primers  
839 are listed in Table S4. The cycling conditions were as follows: 95°C for 2 minutes, 95°C  
840 for 10 minutes, and 40 cycles of 95°C for 15 seconds followed by 60°C for 1 minute. All  
841 qPCR was run in technical duplicate or triplicate. The comparative threshold cycle ( $C_T$ )  
842 was used to quantify transcripts, with the ribosomal 18s gene (*RNA18S5*) serving as the  
843 housekeeping control.  $\Delta C_T$  values were calculated by subtracting the  $C_T$  value of the

844 control gene from the target gene, and the  $\Delta\Delta C_T$  was calculated by subtracting the  
845 nontargeting siRNA  $\Delta C_T$  from the targeting siRNA  $\Delta C_T$  value. Fold change represents  $2^{-\Delta\Delta C_T}$ .  
846  $\Delta\Delta C_T$ .

847

#### 848 *ARHGEF26 and RHOG* Overexpression Plasmids

849 *ARHGEF26 and RHOG* overexpression plasmids (Table S3) were transformed  
850 using the Lipofectamine 3000 kit (Thermo) according to manufacturer instructions. Most  
851 plasmids were generated in previous work (45, 48), and all remaining plasmids were  
852 generated through site-directed mutagenesis (QuickChange Lightning, Agilent) or cut-  
853 and-paste cloning. Assays using overexpression plasmids were performed twenty-four  
854 hours post transfection.

855

#### 856 Microscopy

857 Cells were fixed for thirty minutes in 4% paraformaldehyde and blocked for thirty  
858 minutes in a 5% normal donkey serum, 0.2% saponin, PBS solution. Cells were incubated  
859 overnight at 4°C with an anti-myc antibody (Developmental Studies Hybridoma Bank,  
860 9e10, followed by secondary staining using Alexa Fluor™ secondary anti-mouse antibody  
861 (Thermo). Anti-Myc (9e10) was deposited to the DSHB by Bishop, J.M. (DSHB  
862 Hybridoma Product 9e10). Actin staining was performed using Alexa Fluor™ 647  
863 Phalloidin (Thermo) according to manufacturer instructions. Micrographs were taken  
864 using an AMG EVOS microscope.

865

#### 866 Phosphoinositide Dot Blot Assays

867 Twenty-four hours before transfection, 1,500,000 HeLa cells were plated on a 10-  
868 cm dish or 1,000,000 Hek293T cells were plated in three separate wells of a six-well dish.  
869 Cells were transfected as above, but to normalize for expression, 1  $\mu$ g of AKT-PH-GFP  
870 was diluted with 7  $\mu$ g vector. Twenty-four hours later, cells were washed, and directly  
871 scraped into lysis buffer (50mM Tris, pH 7.6, 150mM NaCl, 1% Triton X-100, 5mM MgCl<sub>2</sub>,  
872 cOmplete Mini protease inhibitor cocktail (Sigma)), and incubated at 4°C for 30 minutes.  
873 PIP strips (PIP Strips (Echelon) were blocked using Odyssey® Blocking Buffer (Licor) or  
874 Intercept Blocking Buffer (Licor). Samples were cleared by centrifugation and diluted 1:25  
875 into blocking buffer before addition to the PIP strips (Echelon Biosciences). After one hour  
876 incubation with rocking at room temperature, PIP strips were washed 3 times with PBS-  
877 T, and incubated with an anti-GFP primary antibody (Novus, NB600-308). After one hour  
878 rocking at room temperature, PIP strips were washed three times with PBS-T, and stained  
879 with a IRDye® donkey anti-rabbit secondary antibody (Licor). After thirty minutes, strips  
880 were washed three times with PBS-T, once with PBS, and imaged on a LI-COR Odyssey  
881 Classic.

882

### 883 Analysis of HeLa Cytokine Production

884 For siRNA experiments, two days post transfection media was changed 2 hours before  
885 infection. HeLa cells were then infected with late log phase bacteria (*S. Typhimurium*:  
886 MOI 1; *S. Typhi*: MOI 30) for 60 minutes. After 60 minutes, gentamycin was added and  
887 bacteria were returned to 37°C incubator for 5 hours. Six hours post infection  
888 supernatants were collected. For overexpression experiments, media was changed 18-  
889 24 hours post infection. Six hours after the media change, supernatants were collected.

890 Supernatants were stored at  $-80^{\circ}\text{C}$  until use. Cytokine concentrations were determined  
891 using a human IL-8 DuoSet ELISA kit (R&D Systems).

892

### 893 Mouse Infections

894 C57BL6/J mice were obtained from JAX and housed in barrier cages in the Duke  
895 University's Division of Laboratory Animal Resources husbandry facility. Following arrival  
896 at the Duke University's Division of Laboratory Animal Resources husbandry facility,  
897 *Arhgef26*<sup>-/-</sup> mice (64) were rederived as specific pathogen free mice by embryo  
898 transplantation. Mice were fed rodent diet 5053 chow.

899 For the enteric fever model of infection, age and sex matched 7-12 week old  
900 C57BL/6J or *Arhgef26*<sup>-/-</sup> mice were fasted for 12 hours prior to infection, and treated with  
901 a 100 $\mu\text{L}$  of a 10% sodium bicarbonate solution 30 minutes prior to infection. Bacteria were  
902 grown as described above, washed, and resuspended in PBS at a concentration of  $1 \times 10^9$   
903 bacteria/mL, and 100 $\mu\text{L}$  were administered to the mice for an estimated final dose of  
904  $1 \times 10^8$  bacteria/mouse. Inoculum was confirmed by plating for CFUs. All mice were  
905 monitored daily for changes in morbidity. Mice were euthanized by  $\text{CO}_2$  asphyxiation four  
906 days post infection and tissues were harvested, weighed, homogenized, and plated for  
907 CFU quantification.

908 For the gastroenteritis model of infection (10), mice were 7-12 week old C57BL/6J  
909 or *Arhgef26*<sup>-/-</sup> mice were fasted four hours before treatment with 20 $\mu\text{g}$  of streptomycin  
910 (Sigma) in 75 $\mu\text{L}$  of sterile water 24 hours before infection. Food was returned until four  
911 hours before infection, when they were fasted again. Thirty minutes before infection, mice  
912 received 100 $\mu\text{L}$  of a 10% sodium bicarbonate solution. Bacteria, grown as described

913 above, were washed and resuspended in PBS at a concentration of  $1 \times 10^{10}$  bacteria/mL,  
914 and 100 $\mu$ L were administered to the mice for an estimated final dose of  $1 \times 10^9$   
915 bacteria/mouse. Food was returned four hours after infection. Inoculum was confirmed by  
916 plating for CFUs. All mice were monitored daily for changes in morbidity. Two days post  
917 infection, mice were euthanized by CO<sub>2</sub> asphyxiation and tissues were removed either  
918 weighed and plated for CFUs as described above or prepared for histopathologic  
919 examination.

920 Cecal and colon tissues were fixed 48-72 hours in 10% neutral buffered formalin,  
921 processed routinely, embedded in paraffin, cut at 5mm and stained with hematoxylin and  
922 eosin. Tissues were evaluated in a masked fashion by a board-certified veterinary  
923 pathologist (JIE) with allocation group concealment. Tissues were scored using a semi-  
924 quantitative grading system of multiple parameters and anatomic compartments (lumen,  
925 surface epithelium, mucosa, and submucosa) to assign summary pathologic injury scores  
926 (82).

927 The histopathologic scoring was (scores in parenthesis). (a) Lumen: empty (0),  
928 necrotic epithelial cells (scant, 1; moderate, 2; dense, 3), and polymorphonuclear  
929 leukocytes (PMNs) (scant, 2; moderate, 3; dense, 4). (b) Surface epithelium: No  
930 pathological changes (0); mild, moderate, or severe regenerative changes (1, 2, or 3,  
931 respectively); patchy or diffuse desquamation (1 or 2); PMNs in epithelium (1); and  
932 ulceration (1). (c) Mucosa: No pathological changes (0); rare (<15%), moderate (15 to  
933 50%), or abundant (>50%) crypt abscesses (1, 2, or 3, respectively); presence of  
934 mucinous plugs (1); presence of granulation tissue (1). (d) Submucosa: No pathological  
935 changes (0); mononuclear cell infiltrate (1 small aggregate, <1 aggregate, or large

936 aggregates plus increased single cells) (0, 1, or 2, respectively); PMN infiltrate (no  
937 extravascular PMNs, single extravascular PMNs, or PMN aggregates) (0, 1, or 2,  
938 respectively); mild, moderate, or severe edema (0, 1, or 2, respectively).

939

#### 940 Statistics

941 All statistics were performed using Graphpad Prism 8 or Microsoft Excel, unless  
942 otherwise noted. Bars and central tendencies representations as well as p-value  
943 calculations are described in all figure legends. Where noted, inter-experimental noise  
944 was removed prior to data visualization or statistical analysis by standardizing data to the  
945 grand mean by multiplying values within an experiment by a constant (average of all  
946 experiments divided by average of specific experiment). Data points were only excluded  
947 if technical failure could be proven (*i.e.* failed RNAi knockdown measured by qPCR), or if  
948 identified by an outlier test. If datapoints were removed by an outlier test, the original  
949 results are reported in the figure legend.

950

#### 951 Data Availability

952 All cellular GWAS data from H2P2 are available through the H2P2 web atlas  
953 (<http://h2p2.oit.duke.edu/H2P2Home/>) (17). All other relevant data are within the  
954 manuscript and its Supporting Information files. All plasmids, primers, bacterial strains,  
955 and mice are available upon request. No other tools or datasets were generated in this  
956 manuscript.

957

958

959

960



- 961 1. Lewis MR. The Ormation of Vacuoles Due to Bacillus Typhosus in the Cells of  
962 Tissue Cultures of the Intestine of the Chick Embryo. J Exp Med. 1920;31(3):293-311.
- 963 2. Salmonella interactions with host cells: type III secretion at work., (2001).
- 964 3. Cloning and molecular characterization of genes whose products allow  
965 Salmonella typhimurium to penetrate tissue culture cells., (1989).
- 966 4. Hardt WD, Chen LM, Schuebel KE, Bustelo XR, Galan JE. S. typhimurium  
967 encodes an activator of Rho GTPases that induces membrane ruffling and nuclear  
968 responses in host cells. Cell. 1998;93(5):815-26.
- 969 5. Hernandez LD, Hueffer K, Wenk MR, Galan JE. Salmonella modulates vesicular  
970 traffic by altering phosphoinositide metabolism. Science. 2004;304(5678):1805-7.
- 971 6. Mallo GV, Espina M, Smith AC, Terebiznik MR, Aleman A, Finlay BB, et al. SopB  
972 promotes phosphatidylinositol 3-phosphate formation on Salmonella vacuoles by  
973 recruiting Rab5 and Vps34. J Cell Biol. 2008;182(4):741-52.
- 974 7. Patel JC, Galan JE. Differential activation and function of Rho GTPases during  
975 Salmonella-host cell interactions. J Cell Biol. 2006;175(3):453-63.
- 976 8. Terebiznik MR, Vieira OV, Marcus SL, Slade A, Yip CM, Trimble WS, et al.  
977 Elimination of host cell PtdIns(4,5)P(2) by bacterial SigD promotes membrane fission  
978 during invasion by Salmonella. Nat Cell Biol. 2002;4(10):766-73.
- 979 9. Zhou D, Chen LM, Hernandez L, Shears SB, Galan JE. A Salmonella inositol  
980 polyphosphatase acts in conjunction with other bacterial effectors to promote host cell  
981 actin cytoskeleton rearrangements and bacterial internalization. Mol Microbiol.  
982 2001;39(2):248-59.

- 983 10. Hapfelmeier S, Ehrbar K, Stecher B, Barthel M, Kremer M, Hardt WD. Role of the  
984 *Salmonella* pathogenicity island 1 effector proteins SipA, SopB, SopE, and SopE2 in  
985 *Salmonella enterica* subspecies 1 serovar Typhimurium colitis in streptomycin-  
986 pretreated mice. *Infect Immun*. 2004;72(2):795-809.
- 987 11. Pretreatment of mice with streptomycin provides a *Salmonella enterica* serovar  
988 Typhimurium colitis model that allows analysis of both pathogen and host., (2003).
- 989 12. Jin C, Gibani MM, Moore M, Juel HB, Jones E, Meiring J, et al. Efficacy and  
990 immunogenicity of a Vi-tetanus toxoid conjugate vaccine in the prevention of typhoid  
991 fever using a controlled human infection model of *Salmonella* Typhi: a randomised  
992 controlled, phase 2b trial. *Lancet*. 2017;390(10111):2472-80.
- 993 13. Dunstan SJ, Hue NT, Han B, Li Z, Tram TT, Sim KS, et al. Variation at HLA-  
994 DRB1 is associated with resistance to enteric fever. *Nat Genet*. 2014;46(12):1333-6.
- 995 14. Gilchrist JJ, Rautanen A, Fairfax BP, Mills TC, Naranbhai V, Trochet H, et al.  
996 Risk of nontyphoidal *Salmonella* bacteraemia in African children is modified by STAT4.  
997 *Nat Commun*. 2018;9(1):1014.
- 998 15. Ko DC, Gamazon ER, Shukla KP, Pfuetzner RA, Whittington D, Holden TD, et al.  
999 Functional genetic screen of human diversity reveals that a methionine salvage enzyme  
1000 regulates inflammatory cell death. *Proc Natl Acad Sci U S A*. 2012;109(35):E2343-52.
- 1001 16. Ko DC, Shukla KP, Fong C, Wasnick M, Brittnacher MJ, Wurfel MM, et al. A  
1002 genome-wide in vitro bacterial-infection screen reveals human variation in the host  
1003 response associated with inflammatory disease. *Am J Hum Genet*. 2009;85(2):214-27.

- 1004 17. Wang L, Pittman KJ, Barker JR, Salinas RE, Stanaway IB, Williams GD, et al. An  
1005 Atlas of Genetic Variation Linking Pathogen-Induced Cellular Traits to Human Disease.  
1006 Cell Host Microbe. 2018;24(2):308-23 e6.
- 1007 18. Alvarez MI, Glover LC, Luo P, Wang L, Theusch E, Oehlers SH, et al. Human  
1008 genetic variation in VAC14 regulates Salmonella invasion and typhoid fever through  
1009 modulation of cholesterol. Proc Natl Acad Sci U S A. 2017;114(37):E7746-E55.
- 1010 19. Truong D, Boddy KC, Canadien V, Brabant D, Fairn GD, D'Costa VM, et al.  
1011 Salmonella exploits host Rho GTPase signalling pathways through the phosphatase  
1012 activity of SopB. Cell Microbiol. 2018;20(10):e12938.
- 1013 20. Aiastui A, Pucciarelli MG, Garcia-del Portillo F. Salmonella enterica serovar  
1014 typhimurium invades fibroblasts by multiple routes differing from the entry into epithelial  
1015 cells. Infect Immun. 2010;78(6):2700-13.
- 1016 21. Hume PJ, Singh V, Davidson AC, Koronakis V. Swiss Army Pathogen: The  
1017 Salmonella Entry Toolkit. Front Cell Infect Microbiol. 2017;7:348.
- 1018 22. Patel JC, Galan JE. Manipulation of the host actin cytoskeleton by Salmonella--  
1019 all in the name of entry. Curr Opin Microbiol. 2005;8(1):10-5.
- 1020 23. Humphreys D, Davidson A, Hume PJ, Koronakis V. Salmonella virulence effector  
1021 SopE and Host GEF ARNO cooperate to recruit and activate WAVE to trigger bacterial  
1022 invasion. Cell Host Microbe. 2012;11(2):129-39.
- 1023 24. Humphreys D, Davidson AC, Hume PJ, Makin LE, Koronakis V. Arf6 coordinates  
1024 actin assembly through the WAVE complex, a mechanism usurped by Salmonella to  
1025 invade host cells. Proc Natl Acad Sci U S A. 2013;110(42):16880-5.

- 1026 25. Patel JC, Galan JE. Investigating the function of Rho family GTPases during  
1027 Salmonella/host cell interactions. *Methods Enzymol.* 2008;439:145-58.
- 1028 26. Chen LM, Hobbie S, Galan JE. Requirement of CDC42 for Salmonella-induced  
1029 cytoskeletal and nuclear responses. *Science.* 1996;274(5295):2115-8.
- 1030 27. Stender S, Friebel A, Linder S, Rohde M, Miold S, Hardt WD. Identification of  
1031 SopE2 from *Salmonella typhimurium*, a conserved guanine nucleotide exchange factor  
1032 for Cdc42 of the host cell. *Mol Microbiol.* 2000;36(6):1206-21.
- 1033 28. Unsworth KE, Way M, McNiven M, Machesky L, Holden DW. Analysis of the  
1034 mechanisms of Salmonella-induced actin assembly during invasion of host cells and  
1035 intracellular replication. *Cell Microbiol.* 2004;6(11):1041-55.
- 1036 29. Ablain J, Xu M, Rothschild H, Jordan RC, Mito JK, Daniels BH, et al. Human  
1037 tumor genomics and zebrafish modeling identify SPRED1 loss as a driver of mucosal  
1038 melanoma. *Science.* 2018;362(6418):1055-60.
- 1039 30. Lilic M, Galkin VE, Orlova A, VanLoock MS, Egelman EH, Stebbins CE.  
1040 Salmonella SipA polymerizes actin by stapling filaments with nonglobular protein arms.  
1041 *Science.* 2003;301(5641):1918-21.
- 1042 31. Hayward RD, Koronakis V. Direct nucleation and bundling of actin by the SipC  
1043 protein of invasive *Salmonella*. *EMBO J.* 1999;18(18):4926-34.
- 1044 32. Zhou D, Mooseker MS, Galan JE. An invasion-associated *Salmonella* protein  
1045 modulates the actin-bundling activity of plastin. *Proc Natl Acad Sci U S A.*  
1046 1999;96(18):10176-81.

- 1047 33. Francis CL, Starnbach MN, Falkow S. Morphological and cytoskeletal changes in  
1048 epithelial cells occur immediately upon interaction with *Salmonella typhimurium* grown  
1049 under low-oxygen conditions. *Mol Microbiol.* 1992;6(21):3077-87.
- 1050 34. Criss AK, Casanova JE. Coordinate regulation of *Salmonella enterica* serovar  
1051 Typhimurium invasion of epithelial cells by the Arp2/3 complex and Rho GTPases.  
1052 *Infect Immun.* 2003;71(5):2885-91.
- 1053 35. Machiela MJ, Chanock SJ. LDlink: a web-based application for exploring  
1054 population-specific haplotype structure and linking correlated alleles of possible  
1055 functional variants. *Bioinformatics.* 2015;31(21):3555-7.
- 1056 36. Ward LD, Kellis M. HaploReg v4: systematic mining of putative causal variants,  
1057 cell types, regulators and target genes for human complex traits and disease. *Nucleic  
1058 Acids Res.* 2016;44(D1):D877-81.
- 1059 37. Consortium GT. The Genotype-Tissue Expression (GTEx) project. *Nat Genet.*  
1060 2013;45(6):580-5.
- 1061 38. Lappalainen T, Sammeth M, Friedlander MR, t Hoen PA, Monlong J, Rivas MA,  
1062 et al. Transcriptome and genome sequencing uncovers functional variation in humans.  
1063 *Nature.* 2013;501(7468):506-11.
- 1064 39. He TC, Chan TA, Vogelstein B, Kinzler KW. PPARdelta is an APC-regulated  
1065 target of nonsteroidal anti-inflammatory drugs. *Cell.* 1999;99(3):335-45.
- 1066 40. Hanisch J, Ehinger J, Ladwein M, Rohde M, Derivery E, Bosse T, et al. Molecular  
1067 dissection of *Salmonella*-induced membrane ruffling versus invasion. *Cell Microbiol.*  
1068 2010;12(1):84-98.

- 1069 41. Pruim RJ, Welch RP, Sanna S, Teslovich TM, Chines PS, Gliedt TP, et al.  
1070 LocusZoom: regional visualization of genome-wide association scan results.  
1071 *Bioinformatics*. 2010;26(18):2336-7.
- 1072 42. Boulter E, Garcia-Mata R, Guilluy C, Dubash A, Rossi G, Brennwald PJ, et al.  
1073 Regulation of Rho GTPase crosstalk, degradation and activity by RhoGDI1. *Nat Cell*  
1074 *Biol*. 2010;12(5):477-83.
- 1075 43. Ren XD, Kiosses WB, Schwartz MA. Regulation of the small GTP-binding protein  
1076 Rho by cell adhesion and the cytoskeleton. *EMBO J*. 1999;18(3):578-85.
- 1077 44. Garcia-Mata R, Boulter E, Burridge K. The 'invisible hand': regulation of RHO  
1078 GTPases by RHOGDIs. *Nature reviews Molecular cell biology*. 2011;12(8):493-504.
- 1079 45. Ellerbroek SM, Wennerberg K, Arthur WT, Dunty JM, Bowman DR, DeMali KA,  
1080 et al. SGEF, a RhoG guanine nucleotide exchange factor that stimulates  
1081 macropinocytosis. *Mol Biol Cell*. 2004;15(7):3309-19.
- 1082 46. Reinhard NR, Van Der Niet S, Chertkova A, Postma M, Hordijk PL, Gadella TWJ,  
1083 Jr., et al. Identification of guanine nucleotide exchange factors that increase Cdc42  
1084 activity in primary human endothelial cells. *Small GTPases*. 2019:1-15.
- 1085 47. Vignal E, De Toledo M, Comunale F, Ladopoulou A, Gauthier-Rouviere C,  
1086 Blangy A, et al. Characterization of TCL, a new GTPase of the rho family related to  
1087 TC10 and Cdc42. *J Biol Chem*. 2000;275(46):36457-64.
- 1088 48. Awadia S, Huq F, Arnold TR, Goicoechea SM, Sun YJ, Hou T, et al. SGEF forms  
1089 a complex with Scribble and Dlg1 and regulates epithelial junctions and contractility. *J*  
1090 *Cell Biol*. 2019;218(8):2699-725.

- 1091 49. Krishna Subbaiah V, Massimi P, Boon SS, Myers MP, Sharek L, Garcia-Mata R,  
1092 et al. The invasive capacity of HPV transformed cells requires the hDlg-dependent  
1093 enhancement of SGEF/RhoG activity. *PLoS Pathog.* 2012;8(2):e1002543.
- 1094 50. Lemmon MA. Pleckstrin homology (PH) domains and phosphoinositides.  
1095 *Biochem Soc Symp.* 2007(74):81-93.
- 1096 51. Marcus SL, Wenk MR, Steele-Mortimer O, Finlay BB. A synaptojanin-  
1097 homologous region of *Salmonella typhimurium* SigD is essential for inositol  
1098 phosphatase activity and Akt activation. *FEBS letters.* 2001;494(3):201-7.
- 1099 52. Mason D, Mallo GV, Terebiznik MR, Payrastre B, Finlay BB, Brumell JH, et al.  
1100 Alteration of epithelial structure and function associated with PtdIns(4,5)P<sub>2</sub> degradation  
1101 by a bacterial phosphatase. *J Gen Physiol.* 2007;129(4):267-83.
- 1102 53. Norris FA, Wilson MP, Wallis TS, Galyov EE, Majerus PW. SopB, a protein  
1103 required for virulence of *Salmonella dublin*, is an inositol phosphate phosphatase. *Proc*  
1104 *Natl Acad Sci U S A.* 1998;95(24):14057-9.
- 1105 54. Yu JW, Mendrola JM, Audhya A, Singh S, Keleti D, DeWald DB, et al. Genome-  
1106 wide analysis of membrane targeting by *S. cerevisiae* pleckstrin homology domains.  
1107 *Molecular cell.* 2004;13(5):677-88.
- 1108 55. Skowronek KR, Guo F, Zheng Y, Nassar N. The C-terminal basic tail of RhoG  
1109 assists the guanine nucleotide exchange factor trio in binding to phospholipids. *J Biol*  
1110 *Chem.* 2004;279(36):37895-907.
- 1111 56. Narayan K, Lemmon MA. Determining selectivity of phosphoinositide-binding  
1112 domains. *Methods.* 2006;39(2):122-33.

- 1113 57. Gewirtz AT, Rao AS, Simon PO, Jr., Merlin D, Carnes D, Madara JL, et al.  
1114 *Salmonella typhimurium* induces epithelial IL-8 expression via Ca(2+)-mediated  
1115 activation of the NF-kappaB pathway. *The Journal of clinical investigation*.  
1116 2000;105(1):79-92.
- 1117 58. Huang FC, Werne A, Li Q, Galyov EE, Walker WA, Cherayil BJ. Cooperative  
1118 interactions between flagellin and SopE2 in the epithelial interleukin-8 response to  
1119 *Salmonella enterica* serovar typhimurium infection. *Infect Immun*. 2004;72(9):5052-62.
- 1120 59. Bruno VM, Hannemann S, Lara-Tejero M, Flavell RA, Kleinstein SH, Galan JE.  
1121 *Salmonella Typhimurium* type III secretion effectors stimulate innate immune responses  
1122 in cultured epithelial cells. *PLoS Pathog*. 2009;5(8):e1000538.
- 1123 60. Hobbie S, Chen LM, Davis RJ, Galan JE. Involvement of mitogen-activated  
1124 protein kinase pathways in the nuclear responses and cytokine production induced by  
1125 *Salmonella typhimurium* in cultured intestinal epithelial cells. *J Immunol*.  
1126 1997;159(11):5550-9.
- 1127 61. Sun H, Kamanova J, Lara-Tejero M, Galan JE. *Salmonella* stimulates pro-  
1128 inflammatory signalling through p21-activated kinases bypassing innate immune  
1129 receptors. *Nat Microbiol*. 2018;3(10):1122-30.
- 1130 62. Keestra AM, Winter MG, Auburger JJ, Frassle SP, Xavier MN, Winter SE, et al.  
1131 Manipulation of small Rho GTPases is a pathogen-induced process detected by NOD1.  
1132 *Nature*. 2013;496(7444):233-7.
- 1133 63. Hobert ME, Sands KA, Mrsny RJ, Madara JL. Cdc42 and Rac1 regulate late  
1134 events in *Salmonella typhimurium*-induced interleukin-8 secretion from polarized  
1135 epithelial cells. *J Biol Chem*. 2002;277(52):51025-32.



- 1136 64. Samson T, van Buul JD, Kroon J, Welch C, Bakker EN, Matlung HL, et al. The  
1137 guanine-nucleotide exchange factor SGEF plays a crucial role in the formation of  
1138 atherosclerosis. *PLoS One*. 2013;8(1):e55202.
- 1139 65. Yeung ATY, Choi YH, Lee AHY, Hale C, Ponstingl H, Pickard D, et al. A  
1140 Genome-Wide Knockout Screen in Human Macrophages Identified Host Factors  
1141 Modulating Salmonella Infection. *mBio*. 2019;10(5).
- 1142 66. Van Puyvelde S, Pickard D, Vandelannoote K, Heinz E, Barbe B, de Block T, et  
1143 al. An African Salmonella Typhimurium ST313 sublineage with extensive drug-  
1144 resistance and signatures of host adaptation. *Nat Commun*. 2019;10(1):4280.
- 1145 67. Jaslow SL, Gibbs KD, Fricke WF, Wang L, Pittman KJ, Mammel MK, et al.  
1146 Salmonella Activation of STAT3 Signaling by SarA Effector Promotes Intracellular  
1147 Replication and Production of IL-10. *Cell Rep*. 2018;23(12):3525-36.
- 1148 68. Misselwitz B, Barrett N, Kreibich S, Vonaesch P, Andrichke D, Rout S, et al.  
1149 Near surface swimming of Salmonella Typhimurium explains target-site selection and  
1150 cooperative invasion. *PLoS Pathog*. 2012;8(7):e1002810.
- 1151 69. Zhang K, Riba A, Nietschke M, Torow N, Repnik U, Putz A, et al. Minimal SPI1-  
1152 T3SS effector requirement for Salmonella enterocyte invasion and intracellular  
1153 proliferation in vivo. *PLoS Pathog*. 2018;14(3):e1006925.
- 1154 70. Fattinger SA, Bock D, Di Martino ML, Deuring S, Samperio Ventayol P, Ek V, et  
1155 al. Salmonella Typhimurium discreet-invasion of the murine gut absorptive epithelium.  
1156 *PLoS Pathog*. 2020;16(5):e1008503.

- 1157 71. Awad A, Sar S, Barre R, Cariven C, Marin M, Salles JP, et al. SHIP2 regulates  
1158 epithelial cell polarity through its lipid product, which binds to Dlg1, a pathway subverted  
1159 by hepatitis C virus core protein. *Mol Biol Cell*. 2013;24(14):2171-85.
- 1160 72. Okuyama Y, Umeda K, Negishi M, Katoh H. Tyrosine Phosphorylation of SGEF  
1161 Regulates RhoG Activity and Cell Migration. *PLoS One*. 2016;11(7):e0159617.
- 1162 73. LaRock DL, Brzovic PS, Levin I, Blanc MP, Miller SI. A Salmonella typhimurium-  
1163 translocated glycerophospholipid:cholesterol acyltransferase promotes virulence by  
1164 binding to the RhoA protein switch regions. *J Biol Chem*. 2012;287(35):29654-63.
- 1165 74. Gibbs KD, Washington EJ, Jaslow SL, Bourgeois JS, Foster MW, Guo R, et al.  
1166 The Salmonella Secreted Effector SarA/SteE Mimics Cytokine Receptor Signaling to  
1167 Activate STAT3. *Cell Host Microbe*. 2020;27(1):129-39 e4.
- 1168 75. Ackermann KL, Florke RR, Reyes SS, Tader BR, Hamann MJ. TCL/RhoJ  
1169 Plasma Membrane Localization and Nucleotide Exchange Is Coordinately Regulated by  
1170 Amino Acids within the N Terminus and a Distal Loop Region. *J Biol Chem*.  
1171 2016;291(45):23604-17.
- 1172 76. Florke RR, Young GT, Hamann MJ. Unraveling a model of TCL/RhoJ allostereism  
1173 using TC10 reverse chimeras. *Small GTPases*. 2020;11(2):138-45.
- 1174 77. Redka DS, Gutschow M, Grinstein S, Canton J. Differential ability of  
1175 proinflammatory and anti-inflammatory macrophages to perform macropinocytosis. *Mol*  
1176 *Biol Cell*. 2018;29(1):53-65.
- 1177 78. Warner N, Burberry A, Pliakas M, McDonald C, Nunez G. A genome-wide small  
1178 interfering RNA (siRNA) screen reveals nuclear factor-kappaB (NF-kappaB)-

- 1179 independent regulators of NOD2-induced interleukin-8 (IL-8) secretion. *J Biol Chem.*  
1180 2014;289(41):28213-24.
- 1181 79. Valdivia A, Goicoechea SM, Awadia S, Zinn A, Garcia-Mata R. Regulation of  
1182 circular dorsal ruffles, macropinocytosis, and cell migration by RhoG and its exchange  
1183 factor, Trio. *Mol Biol Cell.* 2017;28(13):1768-81.
- 1184 80. Datsenko KA, Wanner BL. One-step inactivation of chromosomal genes in  
1185 *Escherichia coli* K-12 using PCR products. *Proc Natl Acad Sci U S A.*  
1186 2000;97(12):6640-5.
- 1187 81. Chang CC, Chow CC, Tellier LC, Vattikuti S, Purcell SM, Lee JJ. Second-  
1188 generation PLINK: rising to the challenge of larger and richer datasets. *GigaScience.*  
1189 2015;4:7.
- 1190 82. Coburn B, Li Y, Owen D, Vallance BA, Finlay BB. *Salmonella enterica* serovar  
1191 Typhimurium pathogenicity island 2 is necessary for complete virulence in a mouse  
1192 model of infectious enterocolitis. *Infect Immun.* 2005;73(6):3219-27.
- 1193
